# Supplementary material for: Spectral signature and behavioral consequence of spontaneous shifts of pupil-linked arousal in human
Source: eLife. 2021 Aug 31;10:e68265. doi: 10.7554/eLife.68265 (PMC8486382; doi:10.7554/eLife.68265)
Supplement: Figure 4—source data 1. [file elife-68265-fig4-data1.csv]

	HR	FAR	d	c	p_corr	catRT	recRT	subject	group	IV
0	0.3389830508474576	0.07692307692307693	1.010836711446776	0.9206585165494594	0.3888888888888889	1.4742788299977292	0.8262403051755629	AA	1	pupil
0	0.41379310344827586	0.038461538461538464	1.551026658591308	0.9933117092230526	0.6111111111111112	1.366068865334657	0.8435518713063175	AA	2	pupil
0	0.49230769230769234	0.08333333333333333	1.3637111762049259	0.7011385389981751	0.6111111111111112	1.3095770265879563	0.9236539498677101	AA	3	pupil
0	0.36666666666666664	0.08333333333333333	1.0422993000128424	0.8618444770942169	0.5	1.4000762277750154	0.8418346416328354	AA	4	pupil
0	0.2807017543859649	0.07692307692307693	0.8453187882642971	1.0034174781406988	0.5138888888888888	1.3722365371468186	0.770821083507043	AA	5	pupil
0	0.03333333333333333	0.041666666666666664	-0.10225023969366953	1.7827895159690799	0.4444444444444444	1.0114720907483337	0.5586446187049255	AC	1	pupil
0	0.05084745762711865	0.038461538461538464	0.1321333918453078	1.7027583425960526	0.5555555555555556	1.0113669953319055	0.4938903189062987	AC	2	pupil
0	0.07547169811320754	0.02631578947368421	0.5017243296980354	1.687069346003811	0.5138888888888888	1.0565253474073617	0.5151297444206698	AC	3	pupil
0	0.25	0.041666666666666664	1.0571746459261635	1.2030770731591633	0.5972222222222222	0.9739394414145105	0.5474345538048939	AC	4	pupil
0	0.22058823529411764	0.125	0.38014129850053213	0.9602787311257418	0.7083333333333334	0.8688246665650468	0.5459669640661231	AC	5	pupil
0	0.7049180327868853	0.09090909090909091	1.8737762192774672	0.3982896264802034	0.7222222222222222	0.8984285192067192	0.35368792117571957	AL	1	pupil
0	0.8064516129032258	0.125	2.0152437390612907	0.1427275108453625	0.7916666666666666	0.8751701745893317	0.28638513839285906	AL	2	pupil
0	0.6551724137931034	0.21428571428571427	1.1909616750929257	0.1961577701969117	0.75	1.1332656439103692	0.3586882424330169	AL	3	pupil
0	0.8412698412698413	0.3333333333333333	1.4304177857845948	-0.2844815935968398	0.7361111111111112	1.1116351631420684	0.4541449261200796	AL	4	pupil
0	0.7037037037037037	0.2222222222222222	1.2997924888727095	0.11481342935003241	0.6944444444444444	1.0411419865537634	0.35626569002321024	AL	5	pupil
0	0.4909090909090909	0.05555555555555555	1.5704293157426585	0.8080041601517214	0.676923076923077	1.2122160333253795	0.955492717603836	AR	1	pupil
0	0.42857142857142855	0.03125	1.6827194976289463	1.0213721186071782	0.6153846153846154	1.2042491108459497	0.9143719644142179	AR	2	pupil
0	0.6346153846153846	0.041666666666666664	2.0757668590052605	0.6937809666196147	0.734375	1.1406417823453694	0.8482655734152615	AR	3	pupil
0	0.6379310344827587	0.07142857142857142	1.8181677788124397	0.5561499032793031	0.7384615384615385	1.1437585343760124	0.8075584615393802	AR	4	pupil
0	0.6363636363636364	0.1	1.6303072610616451	0.4663979350137778	0.7692307692307693	0.9488120296641472	0.7486125901629958	AR	5	pupil
0	0.0625	0.0625	0.0	1.5341205443525463	0.4583333333333333	1.0251763934565536	0.4819445575866944	AW	1	pupil
0	0.2	0.041666666666666664	0.8900431625493309	1.2866428148475797	0.4305555555555556	1.0057188405293498	0.46193500783359315	AW	2	pupil
0	0.09523809523809523	0.2222222222222222	-0.5444620429993899	1.036940695286082	0.5416666666666666	0.9855070331455712	0.443083866991401	AW	3	pupil
0	0.14545454545454545	0.058823529411764705	0.5085970512446154	1.310427945739491	0.4861111111111111	1.048293074060085	0.5055729937393936	AW	4	pupil
0	0.2413793103448276	0.07142857142857142	0.7633611972635628	1.0835531940537417	0.4583333333333333	0.9872721926767932	0.4882501840033784	AW	5	pupil
0	0.33962264150943394	0.1	0.8680583376143445	0.8475223967374281	0.6551724137931034	1.215621259607117	0.5127757398194545	BJB	1	pupil
0	0.46511627906976744	0.03571428571428571	1.7151908442530108	0.945147668612685	0.631578947368421	1.1564927193602743	0.5882999696002771	BJB	2	pupil
0	0.44680851063829785	0.045454545454545456	1.5568928177938288	0.9121752206879833	0.5862068965517241	1.2218698514819952	0.5633271719034618	BJB	3	pupil
0	0.4666666666666667	0.041666666666666664	1.648012662215116	0.907658065014687	0.7719298245614035	1.1016922203700248	0.568672996479595	BJB	4	pupil
0	0.5	0.0625	1.5341205443525463	0.7670602721762732	0.7586206896551724	1.2434698826338466	0.5619626204130946	BJB	5	pupil
0	0.25396825396825395	0.1111111111111111	0.5585861820973549	0.9413472577986726	0.4583333333333333	0.7298137137890863	0.7631902367539156	CW	1	pupil
0	0.5245901639344263	0.18181818181818182	0.9701353511033242	0.423390192985723	0.5277777777777778	0.7290468414756472	0.8001314611524006	CW	2	pupil
0	0.4727272727272727	0.029411764705882353	1.8210940356330847	0.9789629425168876	0.4444444444444444	0.816289407075481	0.8579374050664481	CW	3	pupil
0	0.5666666666666667	0.16666666666666666	1.1353155708898064	0.3997637806567978	0.5555555555555556	0.8140056235699767	0.8517604031072652	CW	4	pupil
0	0.47540983606557374	0.09090909090909091	1.273500253552998	0.698427609342438	0.5555555555555556	0.7686432228368858	0.6992551095956022	CW	5	pupil
0	0.3333333333333333	0.4166666666666667	-0.22029890504753286	0.3205778467716911	0.5555555555555556	1.3625910047978147	0.7647366060957412	DJ	1	pupil
0	0.5833333333333334	0.25	0.8849181444440065	0.23203067797407845	0.5555555555555556	1.1262010065789179	0.7910147036300638	DJ	2	pupil
0	0.603448275862069	0.42857142857142855	0.44229513518432684	-0.04113519779945833	0.6805555555555556	1.0308589126028285	0.7636526439934843	DJ	3	pupil
0	0.7833333333333333	0.5833333333333334	0.5730719811418493	-0.49696438481884947	0.6805555555555556	1.0175185460883793	0.8789687859538667	DJ	4	pupil
0	0.6612903225806451	0.4	0.6693343233254745	-0.08132005852693755	0.7222222222222222	1.097791591306658	0.7242375422733858	DJ	5	pupil
0	0.2830188679245283	0.05555555555555555	1.0193221616748636	1.0835577371856189	0.5	1.006797811794273	0.709649454689472	EC	1	pupil
0	0.29310344827586204	0.038461538461538464	1.224484123583096	1.1565829767271585	0.6388888888888888	0.9135978445936088	0.6234352428023916	EC	2	pupil
0	0.39344262295081966	0.05555555555555555	1.322861334690298	0.9317881506779017	0.5277777777777778	0.8427905200918531	0.7785013995271205	EC	3	pupil
0	0.38181818181818183	0.07142857142857142	1.164524738110603	0.8829714236302215	0.6111111111111112	0.7660124029893924	0.6289840979257835	EC	4	pupil
0	0.36363636363636365	0.08333333333333333	1.0342384315835933	0.8658749113088414	0.625	0.8359727833978923	0.6203742428003807	EC	5	pupil
0	0.8095238095238095	0.125	2.026492229622849	0.13710326556458352	0.75	1.4258653353494108	1.3147000138835603	FSM	1	pupil
0	0.6363636363636364	0.26666666666666666	0.9716814187271325	0.13708501384652153	0.5972222222222222	1.2909516289690133	1.3371947587308897	FSM	2	pupil
0	0.85	0.25	1.7109231396898714	-0.18097181964885406	0.7916666666666666	1.280128164147527	1.3800897420574705	FSM	3	pupil
0	0.8596491228070176	0.2	1.9203654819368863	-0.1185615073955289	0.7222222222222222	1.4704537040541241	1.3898255431494893	FSM	4	pupil
0	0.75	0.5	0.6744897501960817	-0.33724487509804085	0.6666666666666666	1.4047746921439423	1.4041140251604436	FSM	5	pupil
0	0.22580645161290322	0.2	0.08889243931474444	0.797175013915542	0.5	1.278763284292798	0.5669051125605115	JA	1	pupil
0	0.3103448275862069	0.03571428571428571	1.3078699271705667	1.148808127153907	0.4722222222222222	1.2645880532876137	0.5030424462342403	JA	2	pupil
0	0.34375	0.125	0.7480993150542825	0.7762997228488666	0.6111111111111112	1.1284472772011012	0.5182895024366618	JA	3	pupil
0	0.3050847457627119	0.07692307692307693	0.9162453384403573	0.9679542030526688	0.5416666666666666	1.0881930199054877	0.470056994384322	JA	4	pupil
0	0.3333333333333333	0.13333333333333333	0.6800443173413278	0.7707494579661215	0.5555555555555556	1.1634053768708175	0.5080665694950994	JA	5	pupil
0	0.15789473684210525	0.0625	0.5309725766900126	1.26863425600754	0.3076923076923077	1.4267990485093622	0.7382485440298157	JC	1	pupil
0	0.19230769230769232	0.041666666666666664	0.862240622833359	1.3005440847055656	0.4153846153846154	1.360731074139333	0.7759993510544938	JC	2	pupil
0	0.19230769230769232	0.09090909090909091	0.4657539628300509	1.1023007547039114	0.375	1.2285380517873463	0.7460489264929464	JC	3	pupil
0	0.2727272727272727	0.05	1.0402682803682357	1.1247194867673551	0.6307692307692307	1.1200108285861181	0.7526876688080847	JC	4	pupil
0	0.2653061224489796	0.03333333333333333	1.2068429481522331	1.230493161739798	0.47692307692307695	1.1376164044643071	0.8771059234183317	JC	5	pupil
0	0.49206349206349204	0.1111111111111111	1.2007451612492703	0.6202677682227149	0.5138888888888888	1.0440171705651489	0.5912869610085383	JP	1	pupil
0	0.5925925925925926	0.2222222222222222	0.9989288677010066	0.2652452399358838	0.6111111111111112	0.9692524245235872	0.6110622234809348	JP	2	pupil
0	0.5806451612903226	0.2	1.0451654651054005	0.3190385010202139	0.7083333333333334	0.9084772469351365	0.5746995773829061	JP	3	pupil
0	0.5	0.21428571428571427	0.7916386077433746	0.3958193038716873	0.5833333333333334	0.9760290385129211	0.48761059606943036	JP	4	pupil
0	0.5555555555555556	0.1111111111111111	1.3603506477292122	0.540465024982744	0.6388888888888888	1.0037129921307344	0.6055887822172458	JP	5	pupil
0	0.4915254237288136	0.46153846153846156	0.07531440492392003	0.058901412827679064	0.5277777777777778	1.1095883779292106	0.7764707566664887	JS	1	pupil
0	0.46551724137931033	0.21428571428571427	0.7050952398283585	0.4390909878291953	0.5972222222222222	1.1666916562321097	0.7950675862185663	JS	2	pupil
0	0.5806451612903226	0.2	1.0451654651054005	0.3190385010202139	0.6527777777777778	1.0733517835620257	0.7340573964271849	JS	3	pupil
0	0.36666666666666664	0.25	0.3337949231082861	0.5075922886419386	0.4166666666666667	1.1215231050407257	0.8197278911566678	JS	4	pupil
0	0.5901639344262295	0.09090909090909091	1.5631444326849688	0.5536055197764526	0.6805555555555556	1.0775024212706639	0.6932758682007969	JS	5	pupil
0	0.25806451612903225	0.1	0.6322276523581346	0.9654377393655331	0.4444444444444444	1.145578023498173	0.6405344604675823	LS	1	pupil
0	0.4067796610169492	0.25	0.43865296418499033	0.45516326810358654	0.5138888888888888	1.0945533177226834	0.6673346923604792	LS	2	pupil
0	0.4107142857142857	0.125	0.9246414265158485	0.6880286671180836	0.5555555555555556	1.0461315909546505	0.6594048177006092	LS	3	pupil
0	0.3548387096774194	0.1	0.9092622050794092	0.8269204630048957	0.4583333333333333	1.043365731437613	0.6899317820811525	LS	4	pupil
0	0.25	0.08333333333333333	0.7085043769045564	1.0287419386483598	0.4583333333333333	1.0269669387572422	0.7195533756322321	LS	5	pupil
0	0.4918032786885246	0.5454545454545454	-0.13473287350344368	-0.0468188575697064	0.5	1.2321491683684245	0.5807394476627097	MC	1	pupil
0	0.559322033898305	0.15384615384615385	1.1693267844420043	0.43541284056519924	0.625	1.2016811432357852	0.5335696348291903	MC	2	pupil
0	0.5666666666666667	0.5	0.16789400478810546	-0.08394700239405273	0.6666666666666666	1.119859681209429	0.5254081836936343	MC	3	pupil
0	0.65	0.3333333333333333	0.8160477657030253	0.022703416443944913	0.7222222222222222	1.1079307924531148	0.519912097725157	MC	4	pupil
0	0.6	0.3333333333333333	0.6840744024312573	0.08869009807982892	0.6666666666666666	1.1510105099225332	0.5905027620207066	MC	5	pupil
0	0.20754716981132076	0.2222222222222222	-0.050251841063942204	0.7898355943183581	0.25	1.1298255162388893	0.7421908210322385	NA	1	pupil
0	0.3333333333333333	0.08333333333333333	0.9522668278051805	0.9068607131980478	0.3194444444444444	1.1417273293321335	0.6350199546343194	NA	2	pupil
0	0.4426229508196721	0.1	1.1372291792299964	0.7129369759296021	0.4444444444444444	1.2076424205583989	0.5913283052444487	NA	3	pupil
0	0.5	0.08333333333333333	1.382994127100638	0.691497063550319	0.5416666666666666	1.1946593290614185	0.6447148317521901	NA	4	pupil
0	0.5076923076923077	0.2857142857142857	0.5852317728285753	0.27333293551857546	0.6388888888888888	1.1088544729621883	0.5246883409124621	NA	5	pupil
0	0.09803921568627451	0.18181818181818182	-0.3843473606620308	1.1006315488684004	0.3384615384615385	1.3211936057683629	0.7457655890315716	NC	1	pupil
0	0.19607843137254902	0.0625	0.6784081137595742	1.1949164874727591	0.3230769230769231	1.282236661215211	0.6868946907849022	NC	2	pupil
0	0.14285714285714285	0.06666666666666667	0.43351542216588346	1.2843282349610832	0.3125	1.2480484140641437	0.634484388435169	NC	3	pupil
0	0.38181818181818183	0.1111111111111111	0.9199312942724301	0.760674701711135	0.5384615384615384	1.080469887407008	0.6504746100831723	NC	4	pupil
0	0.25	0.045454545454545456	1.016131879388816	1.1825556898904896	0.4461538461538462	1.172571151669679	0.6302003632930372	NC	5	pupil
0	0.2807017543859649	0.13333333333333333	0.530013532628235	0.8457648503226678	0.6527777777777778	1.2688504354408932	1.274853817814801	NM	1	pupil
0	0.36666666666666664	0.16666666666666666	0.6267267390139055	0.6540581965947483	0.6388888888888888	1.2518840662522988	1.2979346483458838	NM	2	pupil
0	0.3508771929824561	0.06666666666666667	1.1181326399185227	0.9420196260847635	0.6388888888888888	1.2326409590637013	1.1592777883079433	NM	3	pupil
0	0.42857142857142855	0.1111111111111111	1.0406279790546449	0.7003263593200276	0.7083333333333334	1.0905488158947492	1.2107715382907651	NM	4	pupil
0	0.4827586206896552	0.07142857142857142	1.4220026015327059	0.7542324919191701	0.6527777777777778	1.1413819139475234	1.037169752432141	NM	5	pupil
0	0.576271186440678	0.05	1.8372169406739827	0.7262451566144815	0.75	1.0032649645648537	0.9680552027722216	SF	1	pupil
0	0.45614035087719296	0.07692307692307693	1.315914624304442	0.7681195601206264	0.5833333333333334	1.0045535526767506	0.8778070507313613	SF	2	pupil
0	0.43103448275862066	0.07692307692307693	1.2523358103610744	0.7999089670923102	0.6111111111111112	0.9138593664922356	0.9343431820666915	SF	3	pupil
0	0.625	0.07142857142857142	1.7838731566498982	0.5732972143605739	0.6527777777777778	0.9982637118288645	0.9886736860472511	SF	4	pupil
0	0.45614035087719296	0.038461538461538464	1.658662790550301	0.939493643243556	0.6111111111111112	0.9400040628823061	0.9531762192038715	SF	5	pupil
0	0.4032258064516129	0.2	0.5966150105355935	0.5433137283051175	0.4027777777777778	0.9066091548511648	0.4680894202035183	SL	1	pupil
0	0.5789473684210527	0.4	0.4525484279250667	0.027072889173266362	0.5833333333333334	0.8780213409645512	0.4551294616309431	SL	2	pupil
0	0.5901639344262295	0.45454545454545453	0.3421519908874603	-0.05689070112230177	0.5138888888888888	0.798103395295344	0.4778398543538237	SL	3	pupil
0	0.6833333333333333	0.3333333333333333	0.9077677277849011	-0.023156564596993	0.4583333333333333	0.7406416124932902	0.47406961485451876	SL	4	pupil
0	0.6779661016949152	0.46153846153846156	0.5585774739387598	-0.1827301216797408	0.4444444444444444	0.801383977392359	0.4374330270725674	SL	5	pupil
0	0.38596491228070173	0.13333333333333333	0.8209200874702824	0.7003115729016441	0.4861111111111111	1.170427028761992	0.5615995439652326	SM	1	pupil
0	0.3333333333333333	0.05555555555555555	1.162491518727593	1.0119730586592541	0.5	1.099294476473612	0.5592853379236986	SM	2	pupil
0	0.3064516129032258	0.2222222222222222	0.2587760196205753	0.6353216639760995	0.4583333333333333	1.217261838581597	0.6273651158304827	SM	3	pupil
0	0.42592592592592593	0.2777777777777778	0.40269967678604124	0.3881059594567577	0.5	1.1587662326902926	0.5721893190594124	SM	4	pupil
0	0.5238095238095238	0.4444444444444444	0.199427398667185	0.03999659954826962	0.4722222222222222	1.1964862837829868	0.6222593615569976	SM	5	pupil
0	0.36923076923076925	0.14285714285714285	0.7336791621769023	0.7007309427896903	0.375	1.275468614161879	0.7105001553352142	TL	1	pupil
0	0.49122807017543857	0.4	0.2313573637582544	0.13766842125667253	0.375	1.151618269359738	0.798551230081014	TL	2	pupil
0	0.4074074074074074	0.058823529411764705	1.3305072774471791	0.8994728326382092	0.4305555555555556	1.0889706002360715	0.6567163976327492	TL	3	pupil
0	0.532258064516129	0.4	0.3342943936170956	0.08619990632725191	0.5	1.2004380219623367	0.7429246752143494	TL	4	pupil
0	0.45	0.18181818181818182	0.7827965216823111	0.5170596076962295	0.3888888888888889	1.1520655440837213	0.8162941000201032	TL	5	pupil
0	0.5862068965517241	0.6153846153846154	-0.0755828521937949	-0.255589806024296	0.5694444444444444	1.0668647684431614	0.43146462339847047	TK	1	pupil
0	0.5873015873015873	0.5555555555555556	0.08089878758155145	-0.18015969267263784	0.6111111111111112	1.1093784210315663	0.4383289497803339	TK	2	pupil
0	0.6615384615384615	0.8571428571428571	-0.6509050025980245	-0.742118022579129	0.6805555555555556	1.1824672127987443	0.4018830800487321	TK	3	pupil
0	0.6792452830188679	0.631578947368421	0.12955125657201427	-0.4008137686578302	0.6805555555555556	1.016314872378454	0.35619951662249605	TK	4	pupil
0	0.6949152542372882	0.5833333333333334	0.29940313958456555	-0.3601299640402076	0.6666666666666666	1.1037293047195993	0.4351506333612431	TK	5	pupil
