# Supplementary material for: Spectral signature and behavioral consequence of spontaneous shifts of pupil-linked arousal in human
Source: eLife. 2021 Aug 31;10:e68265. doi: 10.7554/eLife.68265 (PMC8486382; doi:10.7554/eLife.68265)
Supplement: Figure 5—source data 1. [file elife-68265-fig5-data1.csv]

	power	power_pupil	pupil	power_residual
0	0.5427529235060615	0.5413582233665915	0.4628616385938562	0.5448986160283231
1	0.6162632798146817	0.6241712596852784	0.7039699656522086	0.5551561626327982
2	0.5492831541218639	0.5467673007995588	0.45316377171215877	0.5403225806451613
3	0.42161684469376776	0.4638054253438869	0.5653192960885269	0.39041727503265966
4	0.45713141025641024	0.4928552350427351	0.5300480769230769	0.46474358974358976
5	0.4705698672911788	0.4745251105906844	0.49981785063752276	0.46911267239136095
6	0.514743321194934	0.5186426476749058	0.5433920917791886	0.49595565724597984
7	0.6218141168955605	0.6335675503034174	0.6125519003513255	0.5552219738102843
8	0.5440776699029126	0.5476893203883495	0.5514174757281552	0.5338252427184466
9	0.4973009446693657	0.49302744039586144	0.4837681811366022	0.5059604138551507
10	0.5652855630904315	0.5630512328015367	0.4988436360785543	0.5623456548155698
11	0.5937459027140423	0.5999737773698701	0.5277959879375903	0.5966303920283205
12	0.5152947719688543	0.5119577308120133	0.4791743912989742	0.5147385984427142
13	0.5921989121989122	0.5931934731934732	0.4381662781662781	0.5929137529137529
14	0.44046038069942456	0.43382027445772464	0.29629629629629634	0.4714475431606906
15	0.5085703639299466	0.5031052043224444	0.4878275990560179	0.5021115389392621
16	0.6861673414304993	0.6830971659919028	0.6248313090418354	0.6360998650472335
17	0.6351851851851852	0.6338624338624338	0.5327380952380952	0.6276455026455027
18	0.5636111111111112	0.5581597222222222	0.5548611111111111	0.522986111111111
19	0.5309632270416584	0.5267379679144385	0.4244404832640126	0.5292467155212253
20	0.6249220601072453	0.6192792118718045	0.583395685247537	0.5993265993265993
21	0.5441944556046605	0.5583567697870631	0.552397214410071	0.5278224186420248
22	0.5124195624195624	0.5045045045045045	0.4734555984555985	0.5105855855855855
23	0.5243898310822247	0.5208354490369318	0.5147422226735723	0.5170779594461934
