# Supplementary material for: Spectral signature and behavioral consequence of spontaneous shifts of pupil-linked arousal in human
Source: eLife journal article supplement (doi:10.7554/elife.68265), 2021-08-31

**A.**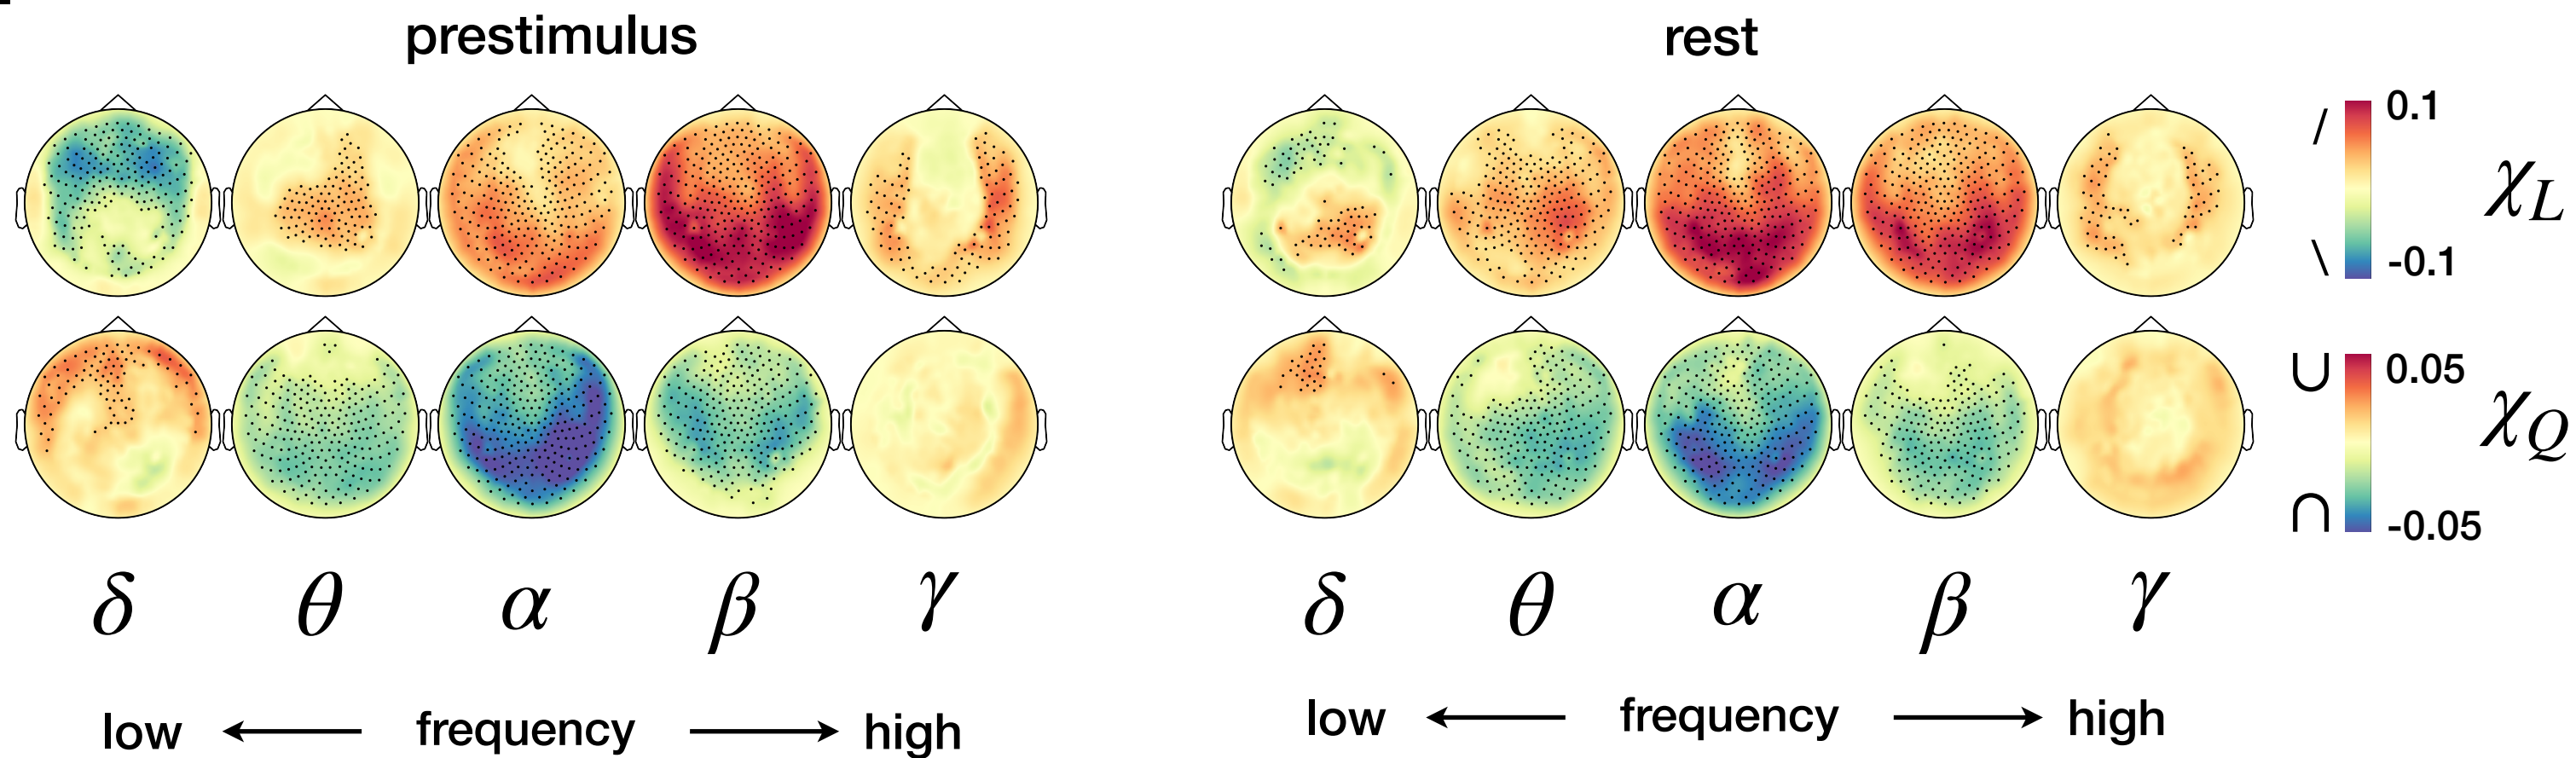

$$\log(\text{Power}_{fband,s}) \sim \chi_Q \text{Pupil}^2 + \chi_L \text{Pupil} + \epsilon$$

$f$ : frequency band,  $s$ : MEG sensor

**B.**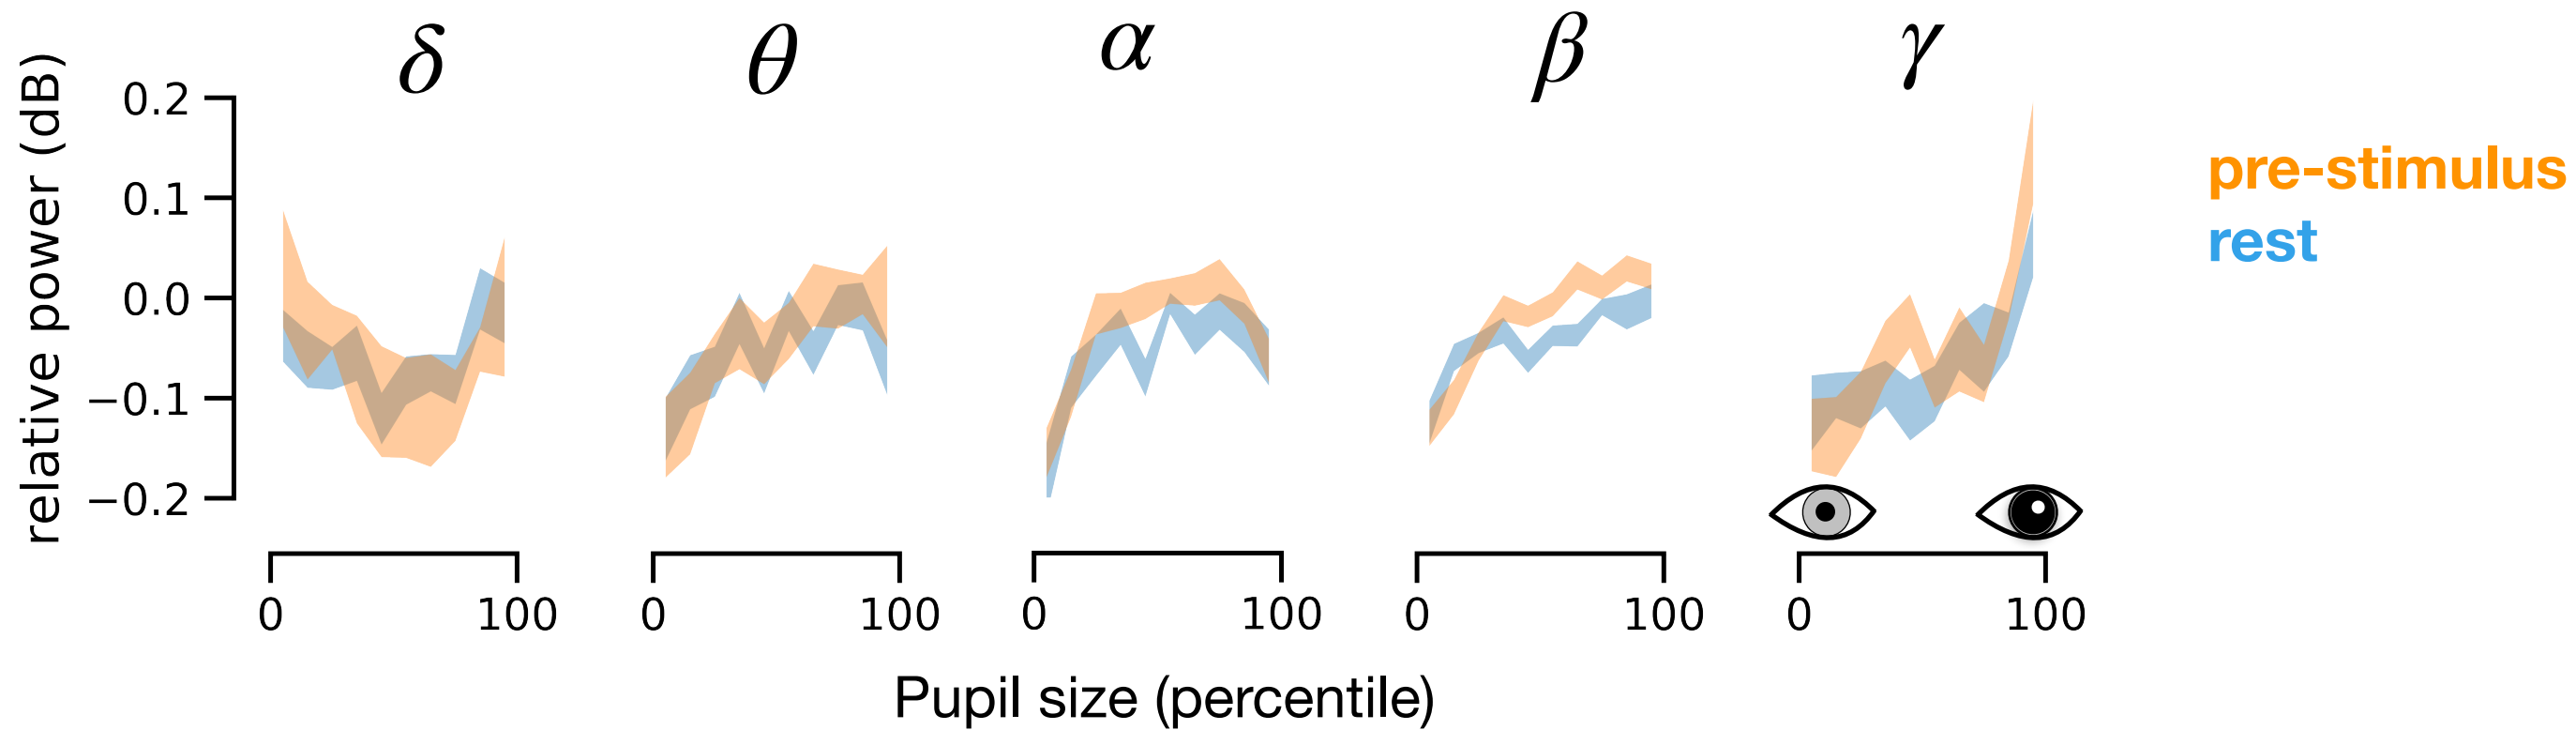

Supplement: supp [file elife-68265-supp-v1.zip]
