# Supplementary figures and images for: Spectral signature and behavioral consequence of spontaneous shifts of pupil-linked arousal in human
Source: eLife journal article supplement (doi:10.7554/elife.68265), 2021-08-31

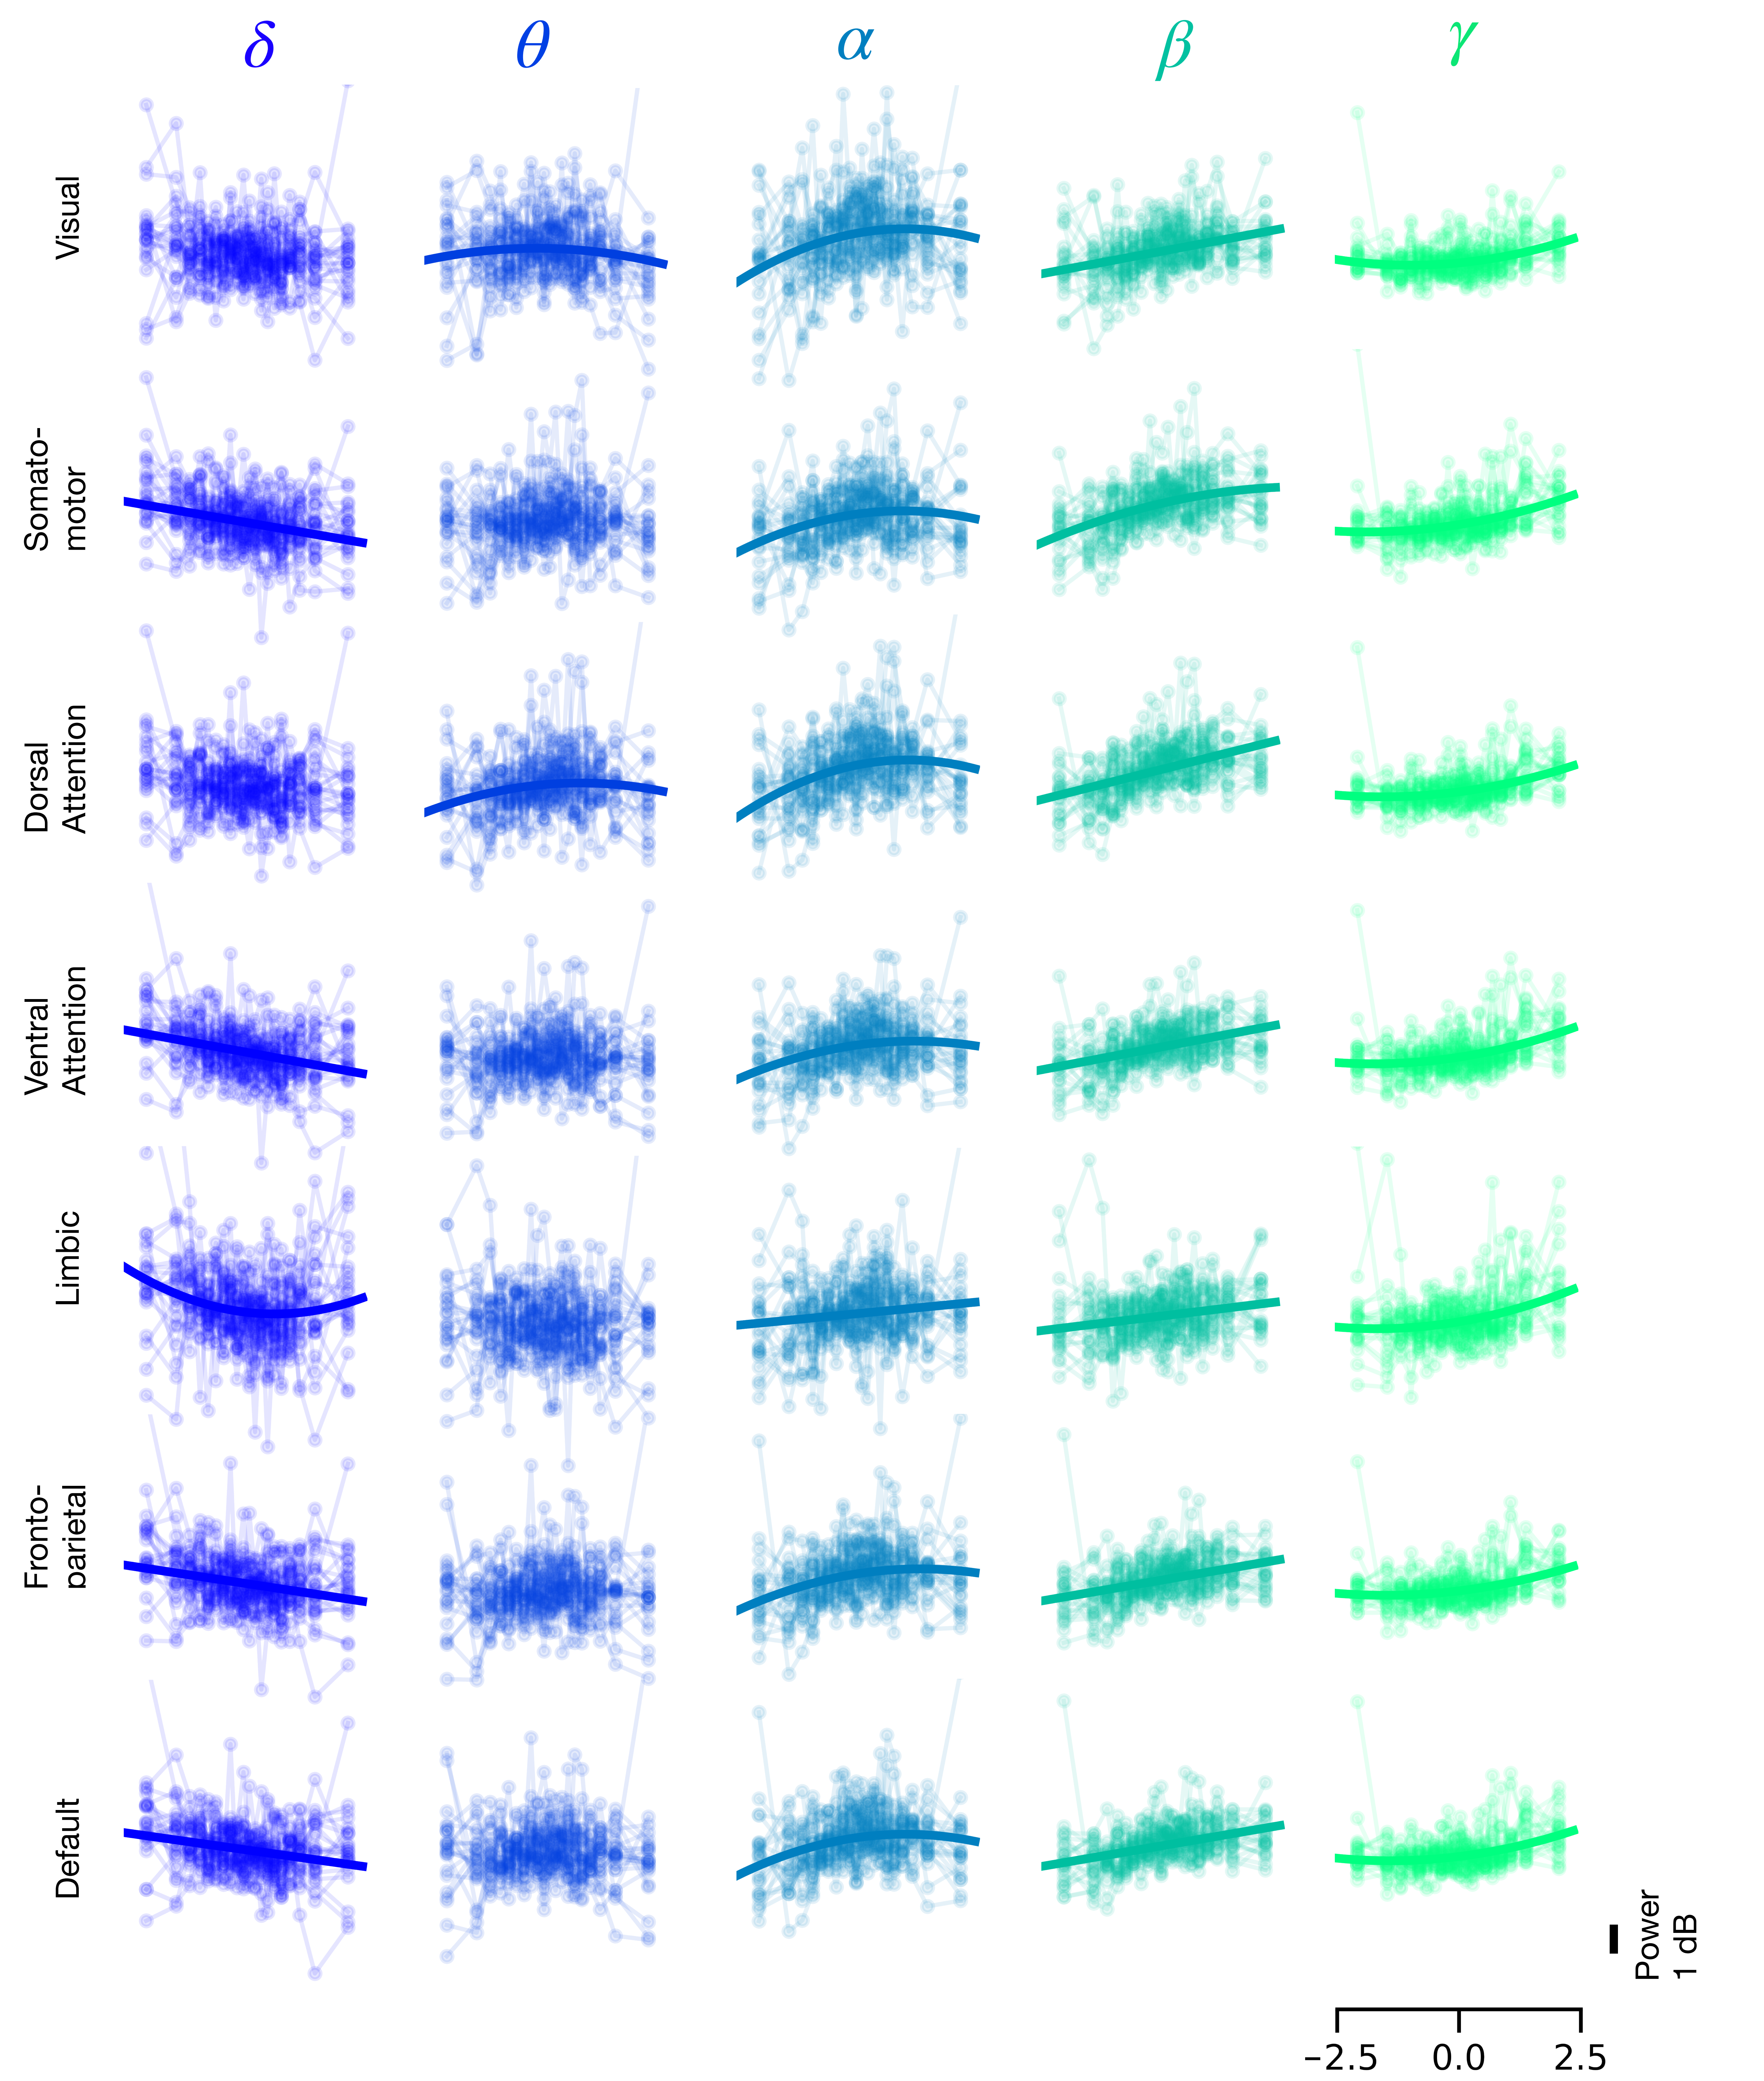

Supplement: supp [file elife-68265-supp-v1.zip]

**A.**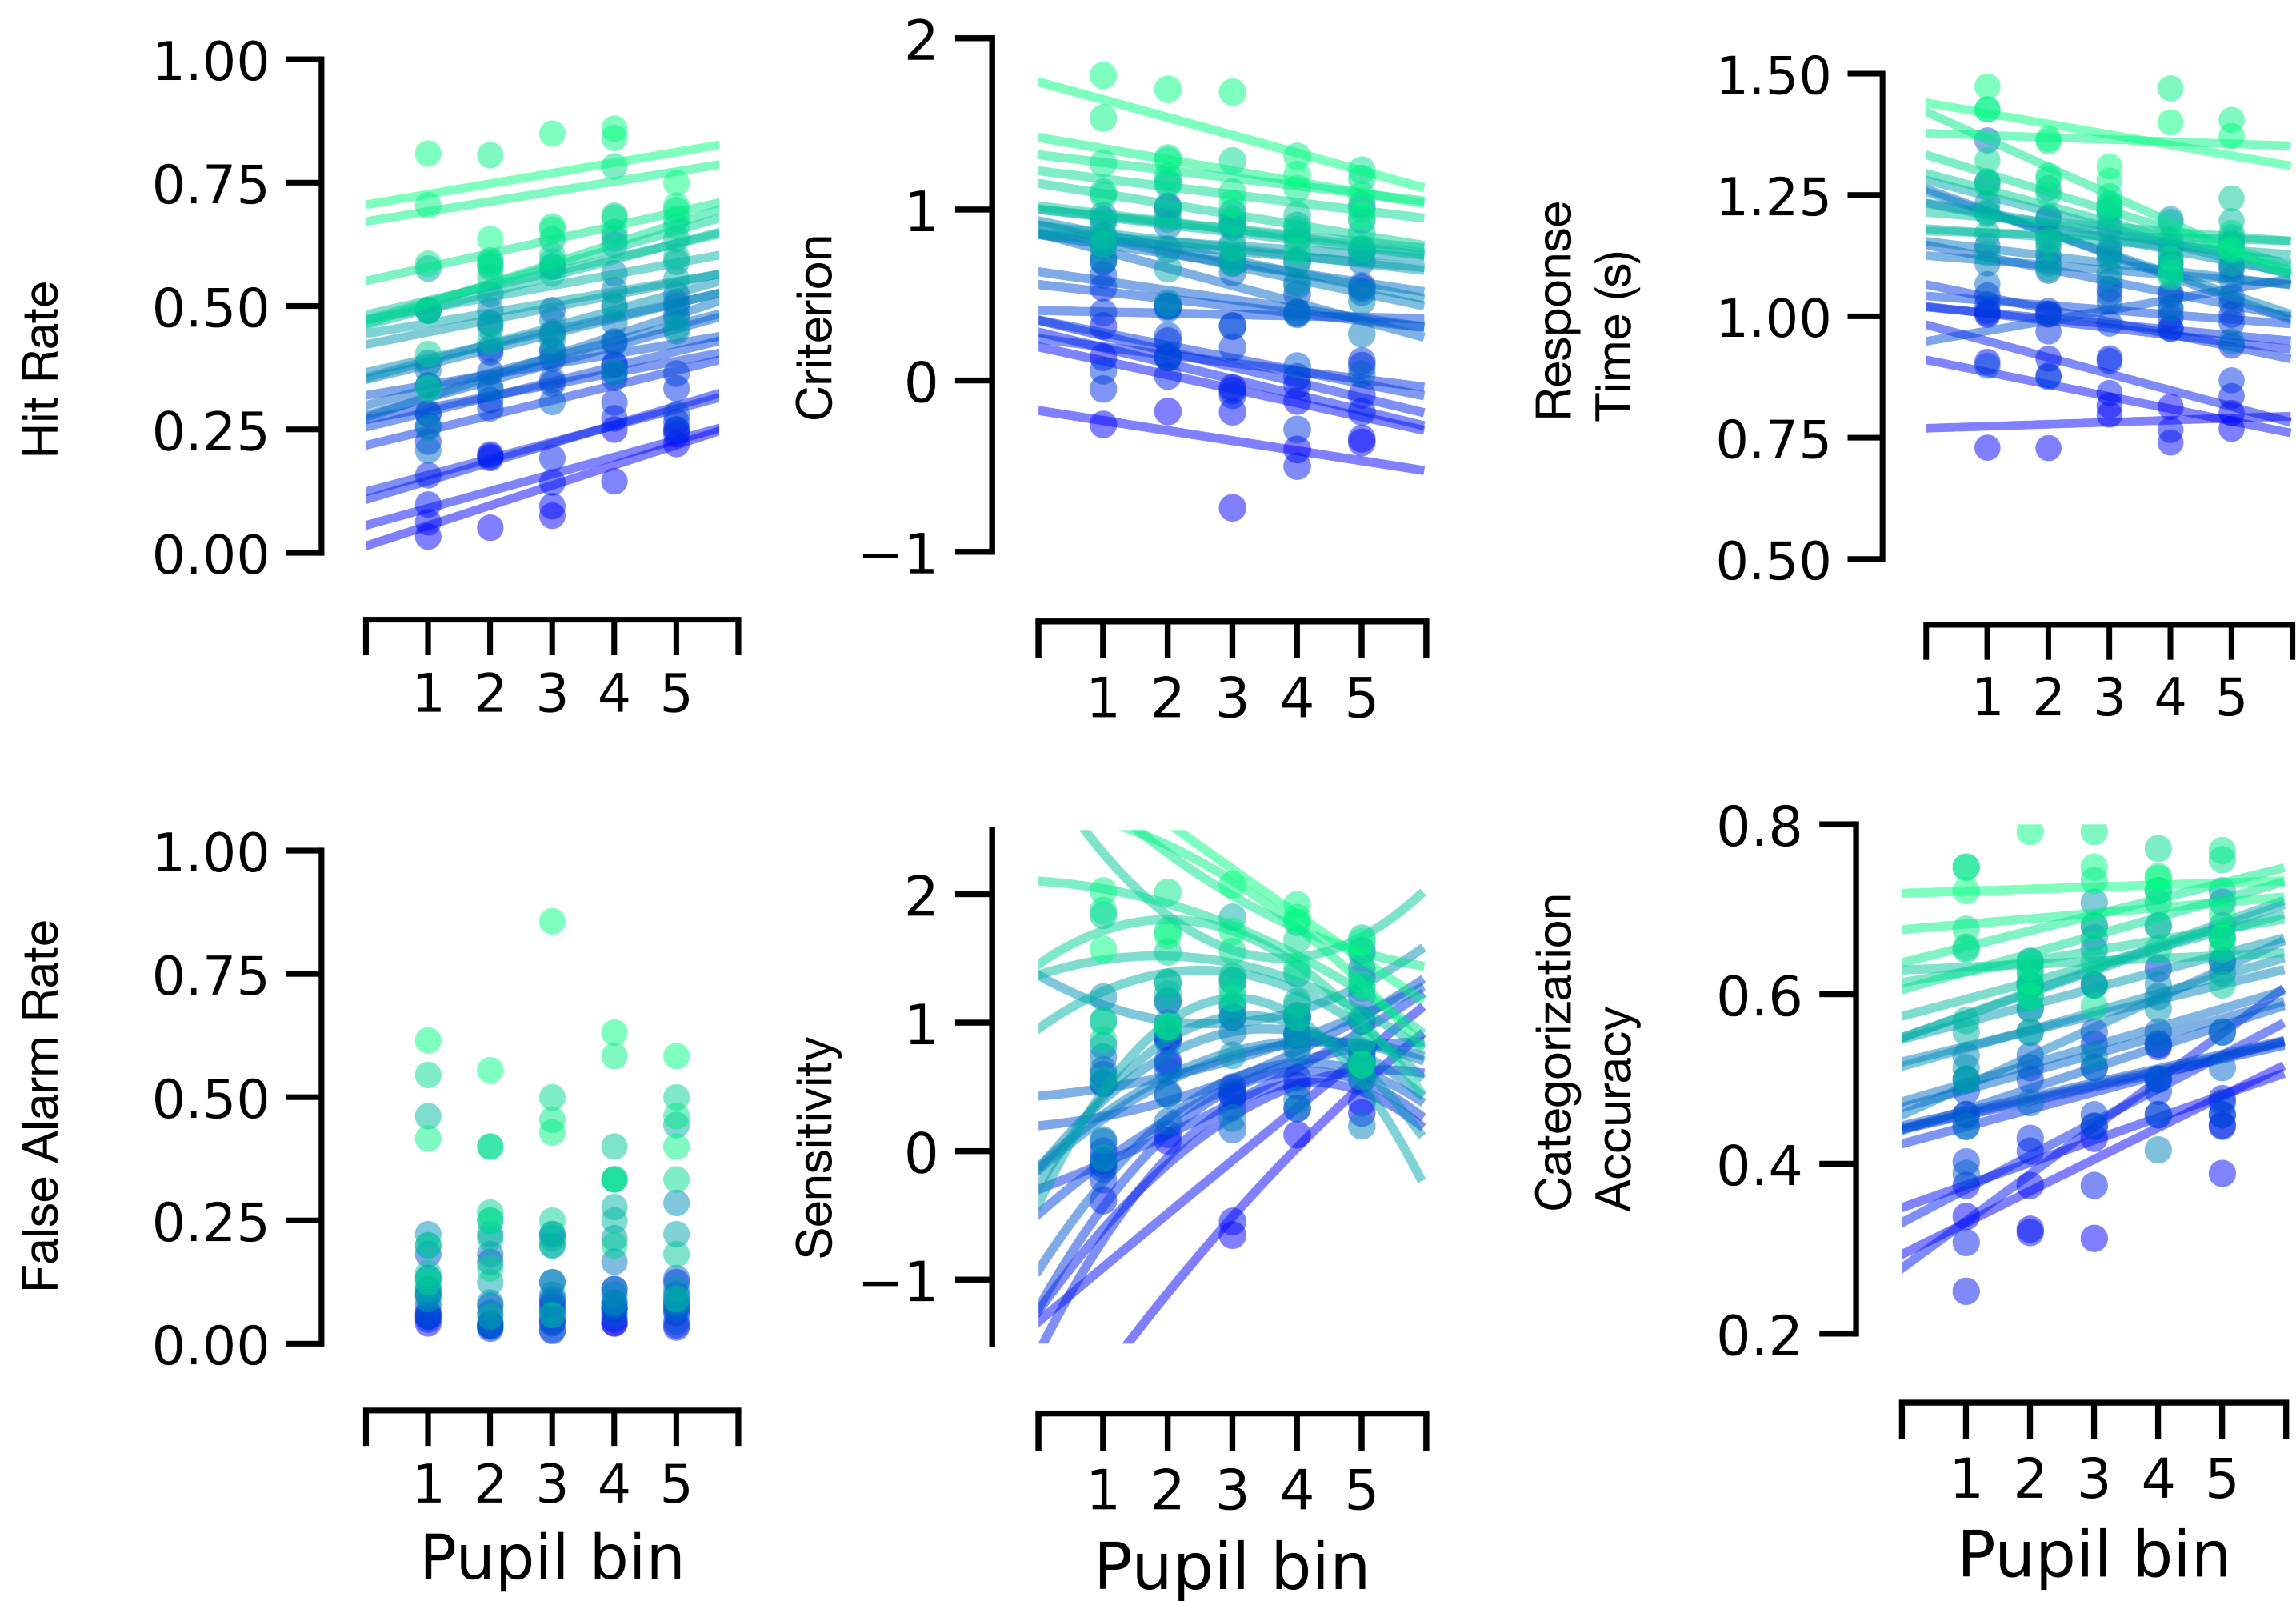**B.**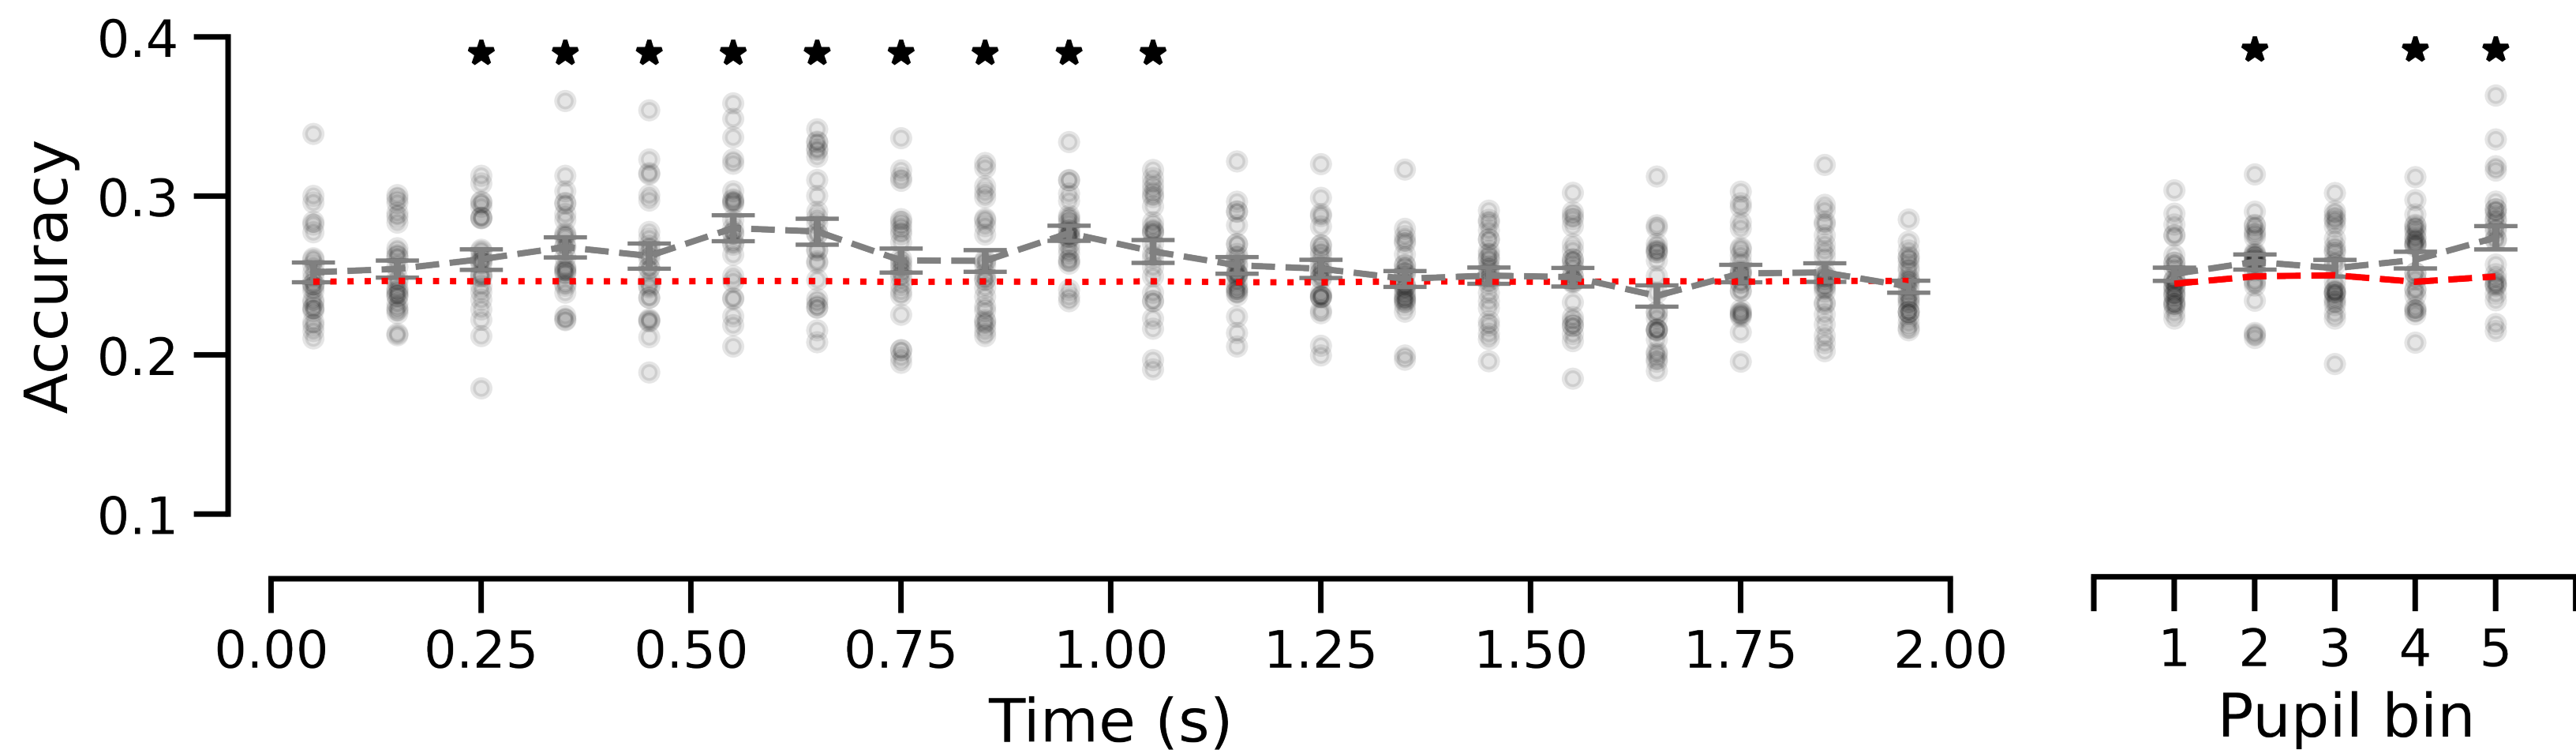

Supplement: supp [file elife-68265-supp-v1.zip]

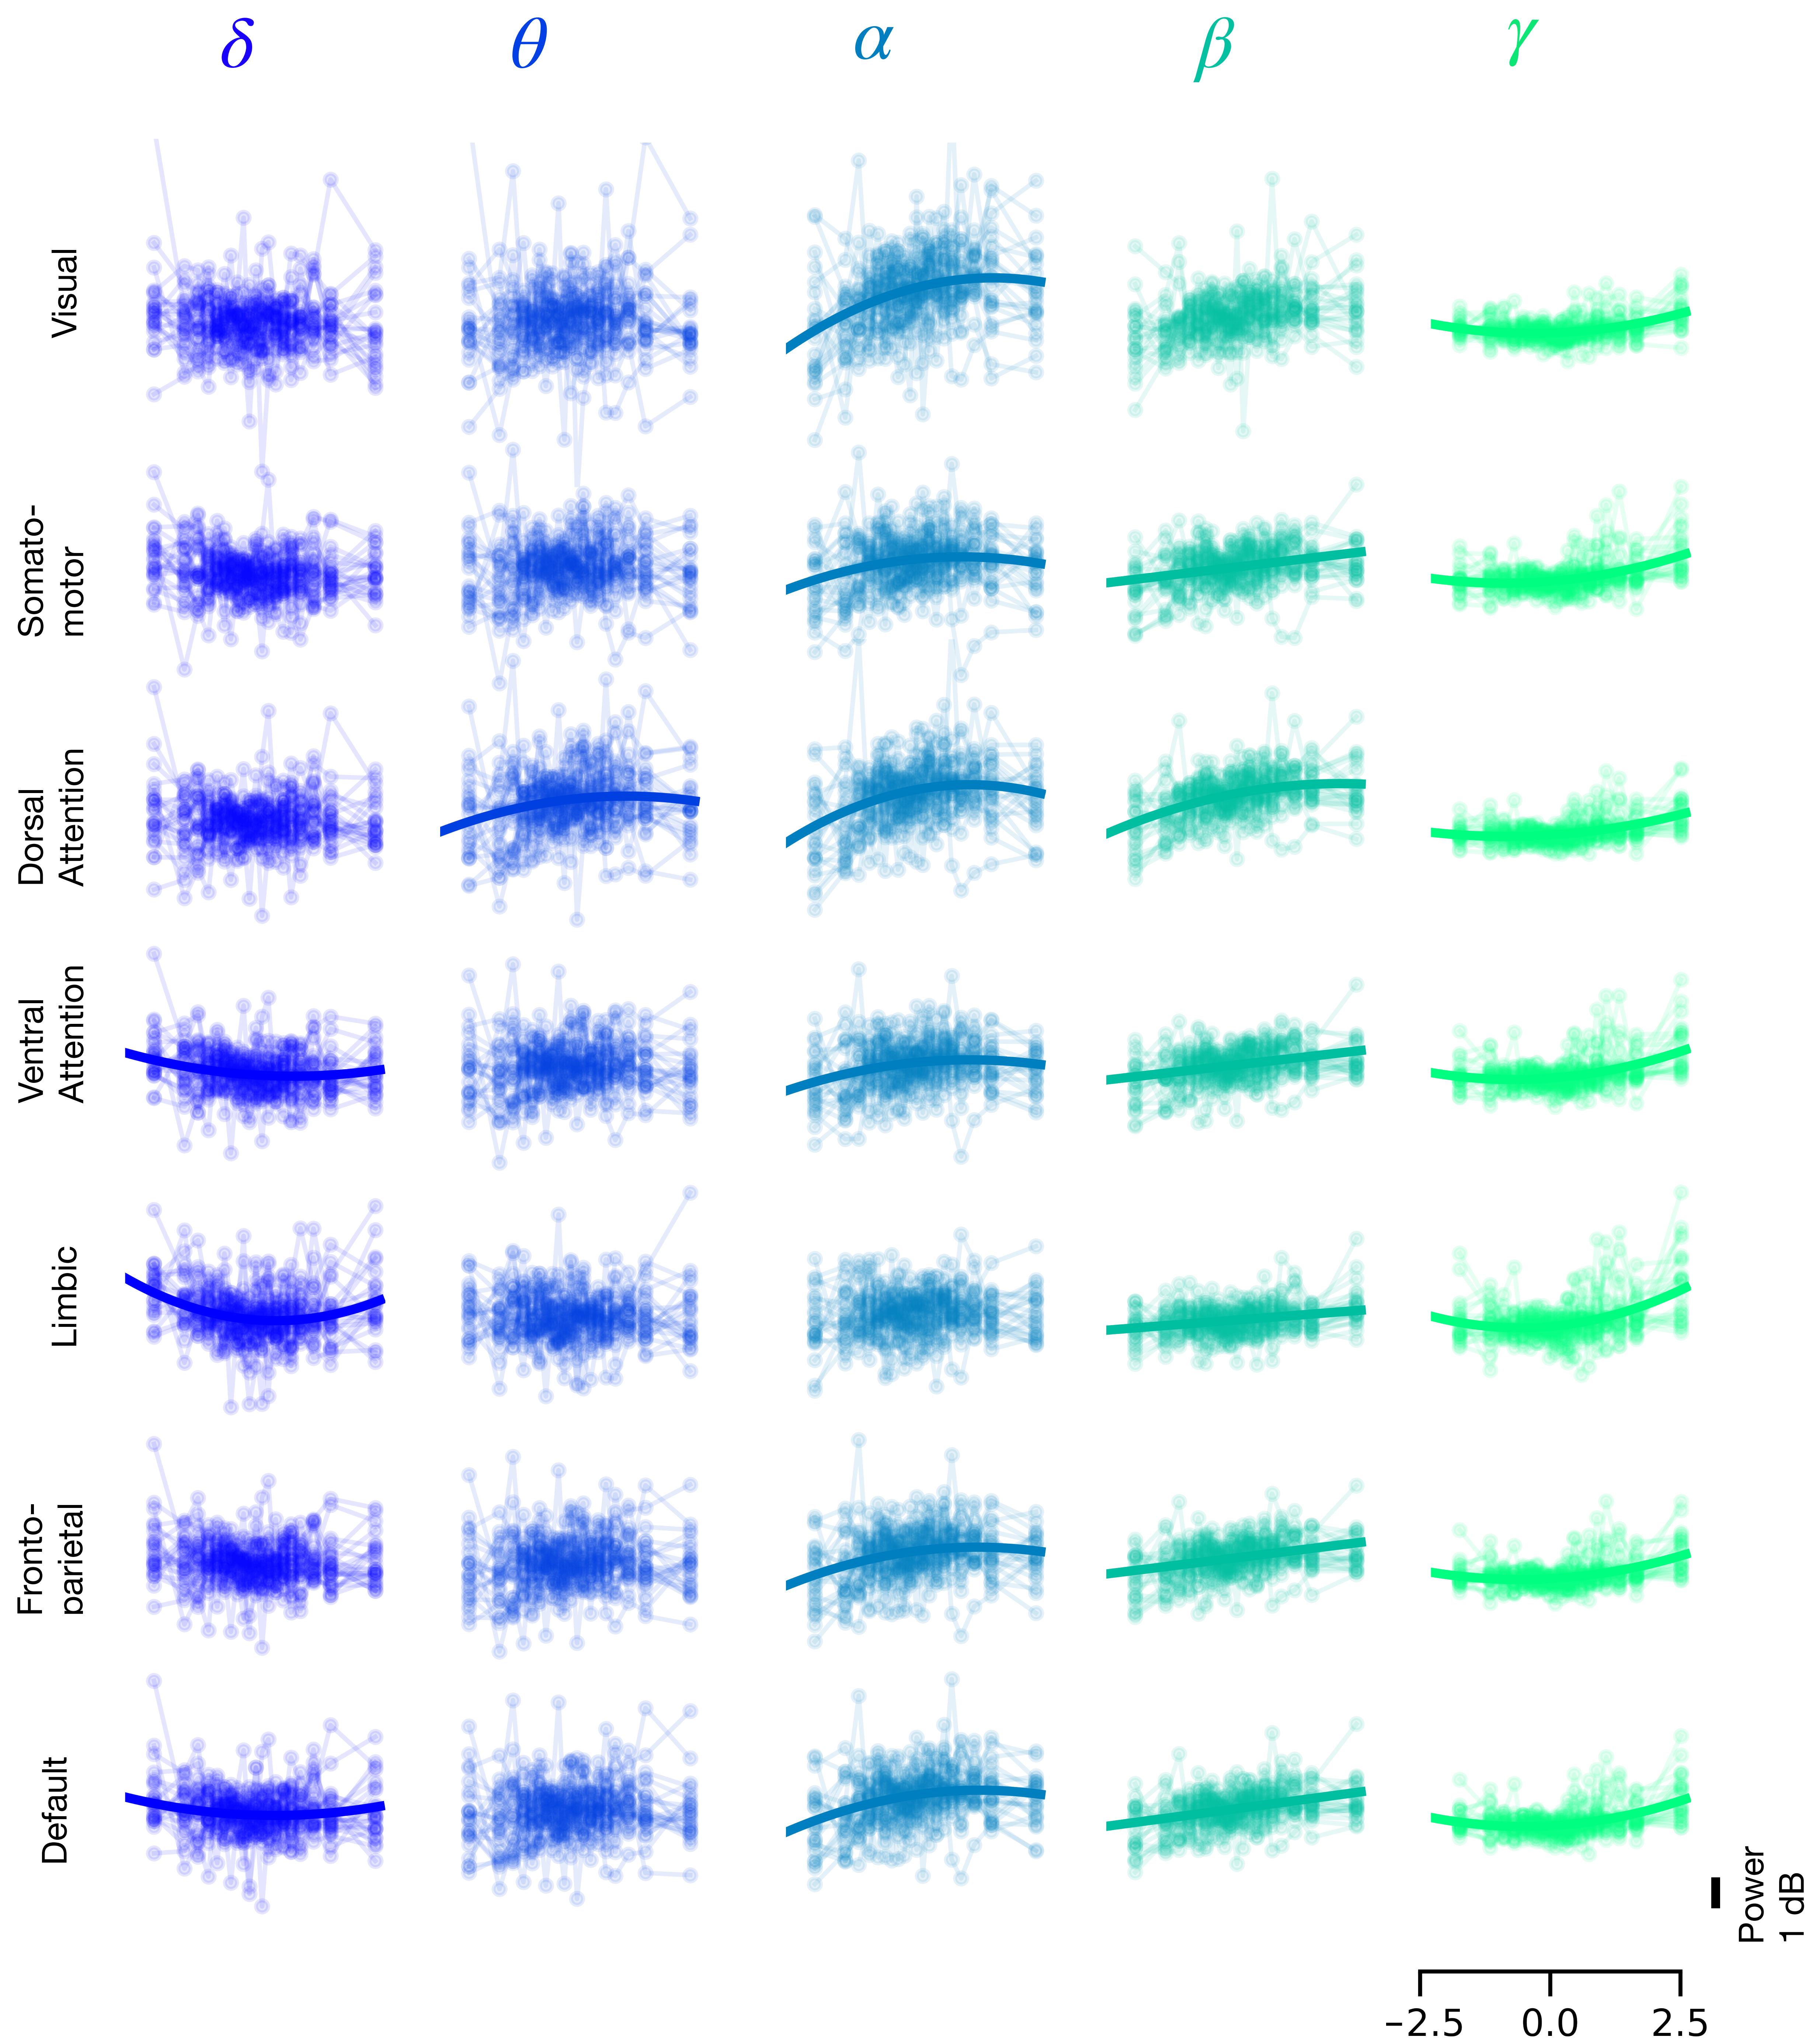

Supplement: supp [file elife-68265-supp-v1.zip]

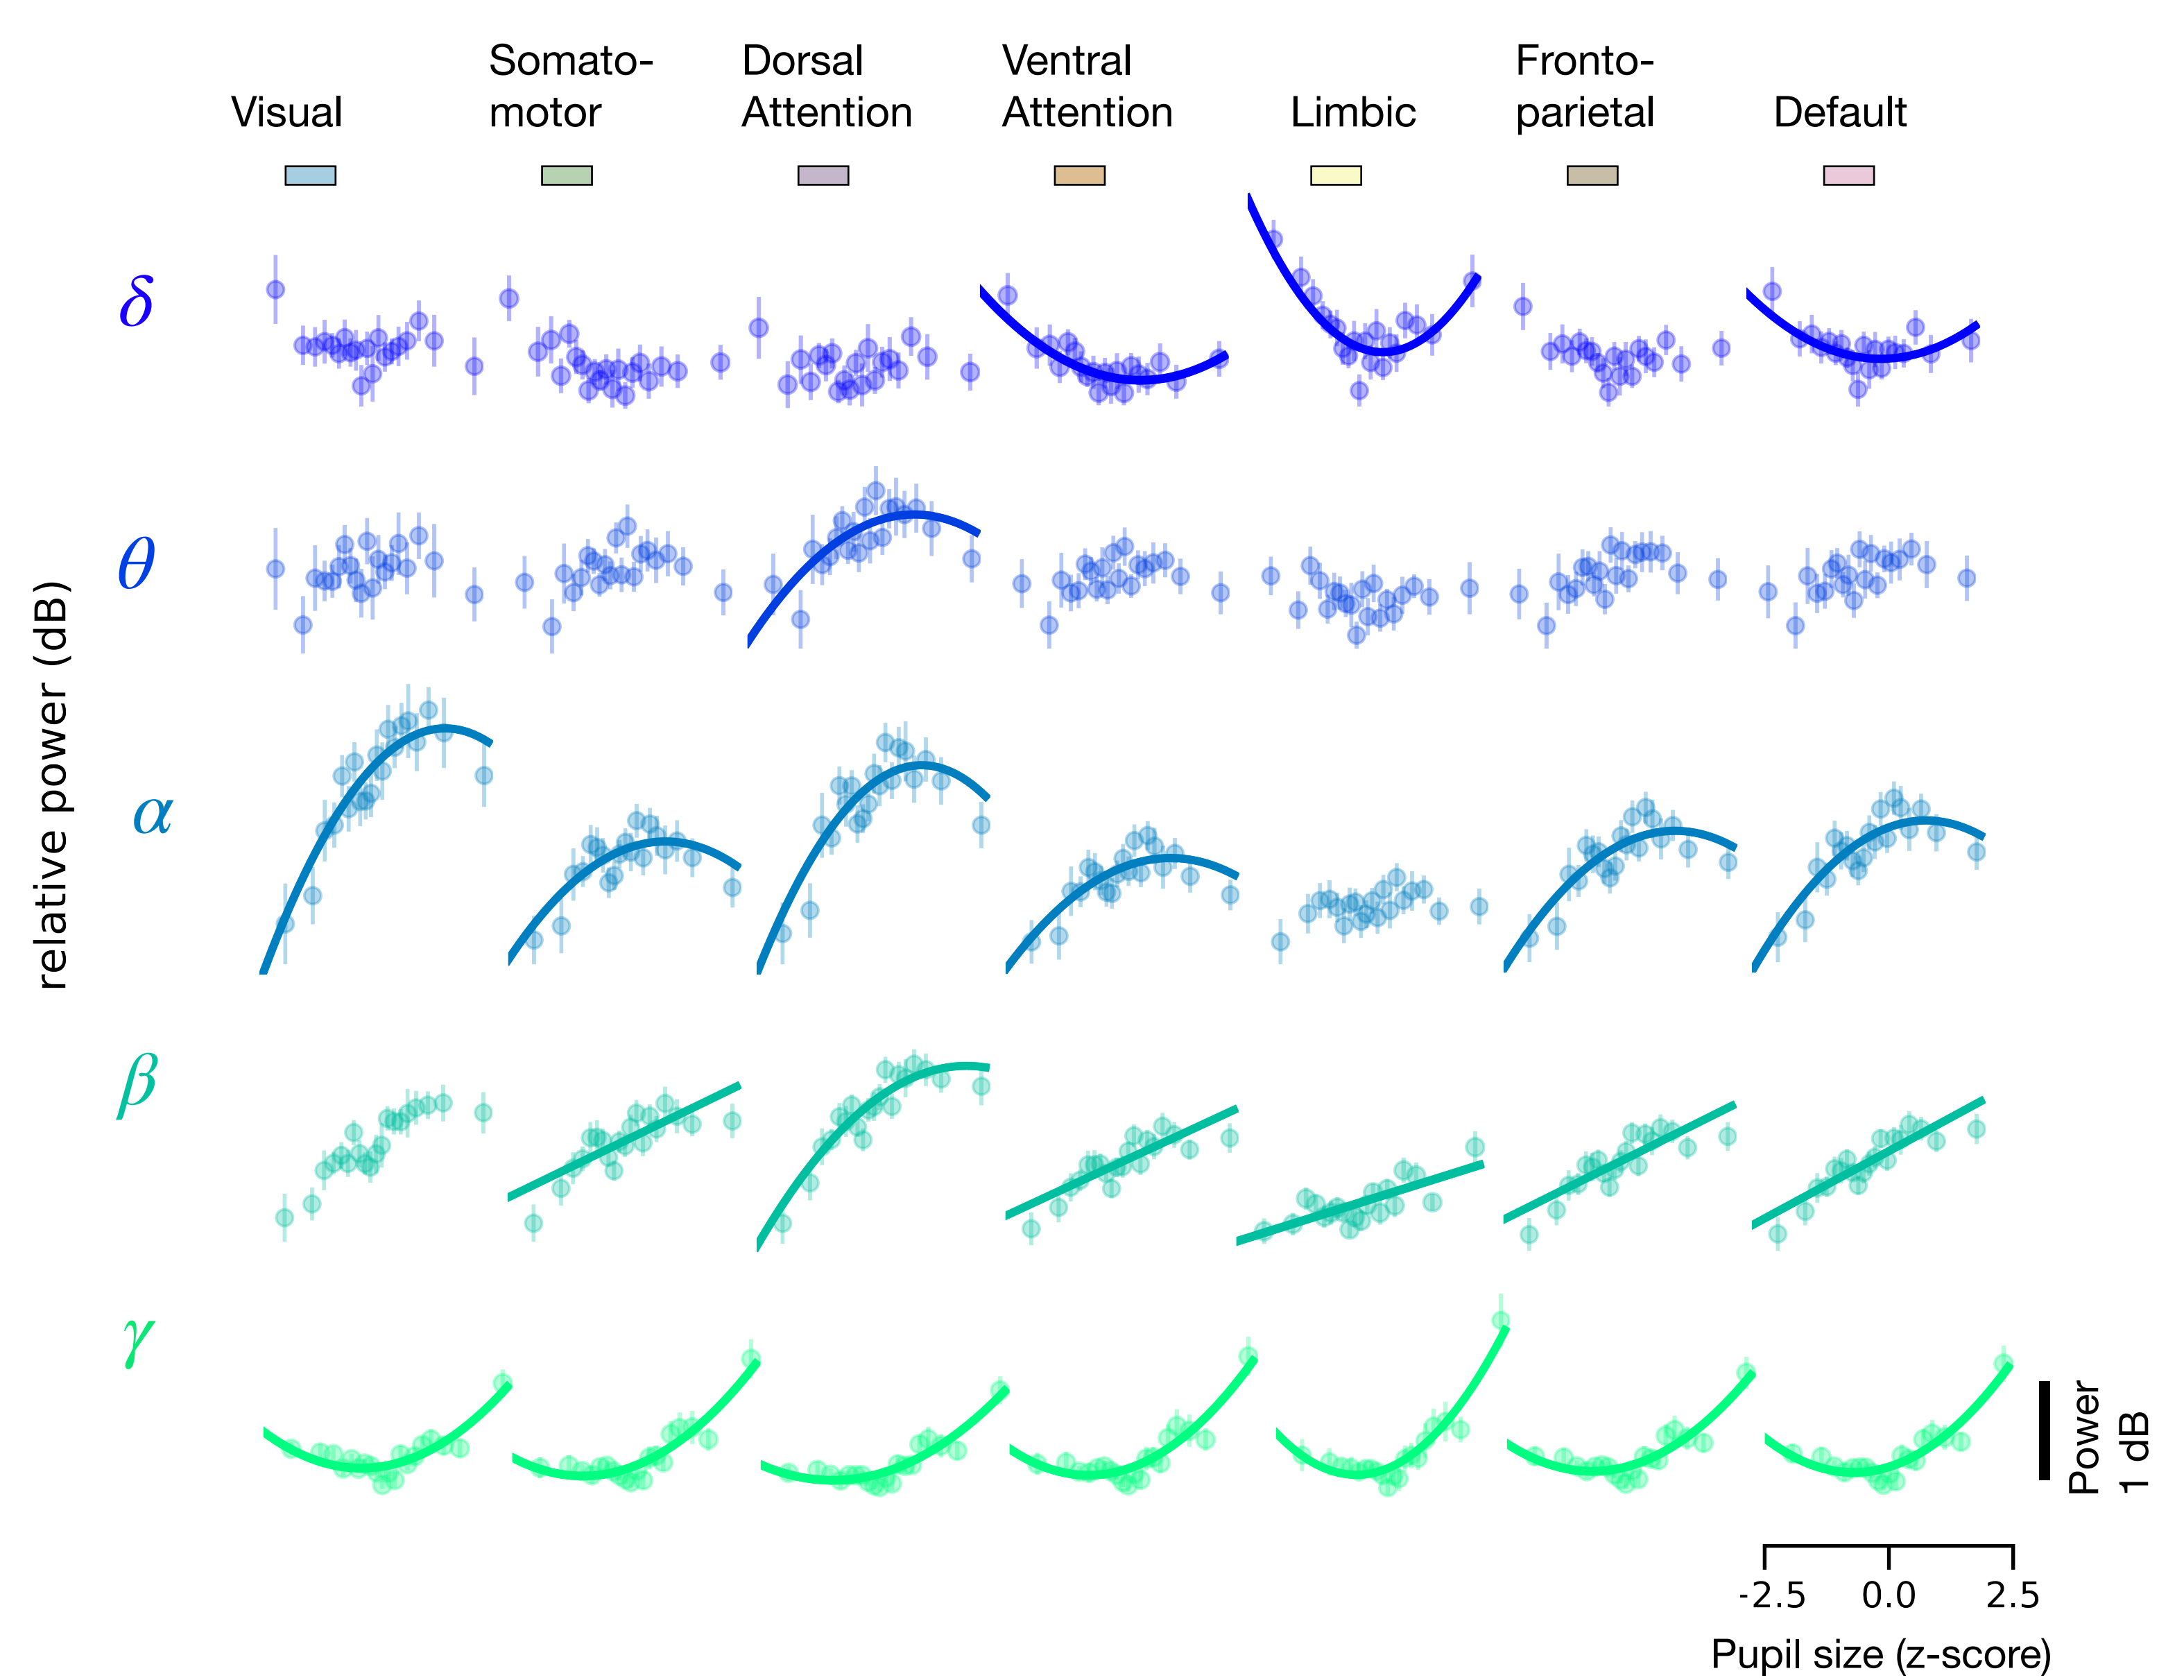

Supplement: supp [file elife-68265-supp-v1.zip]

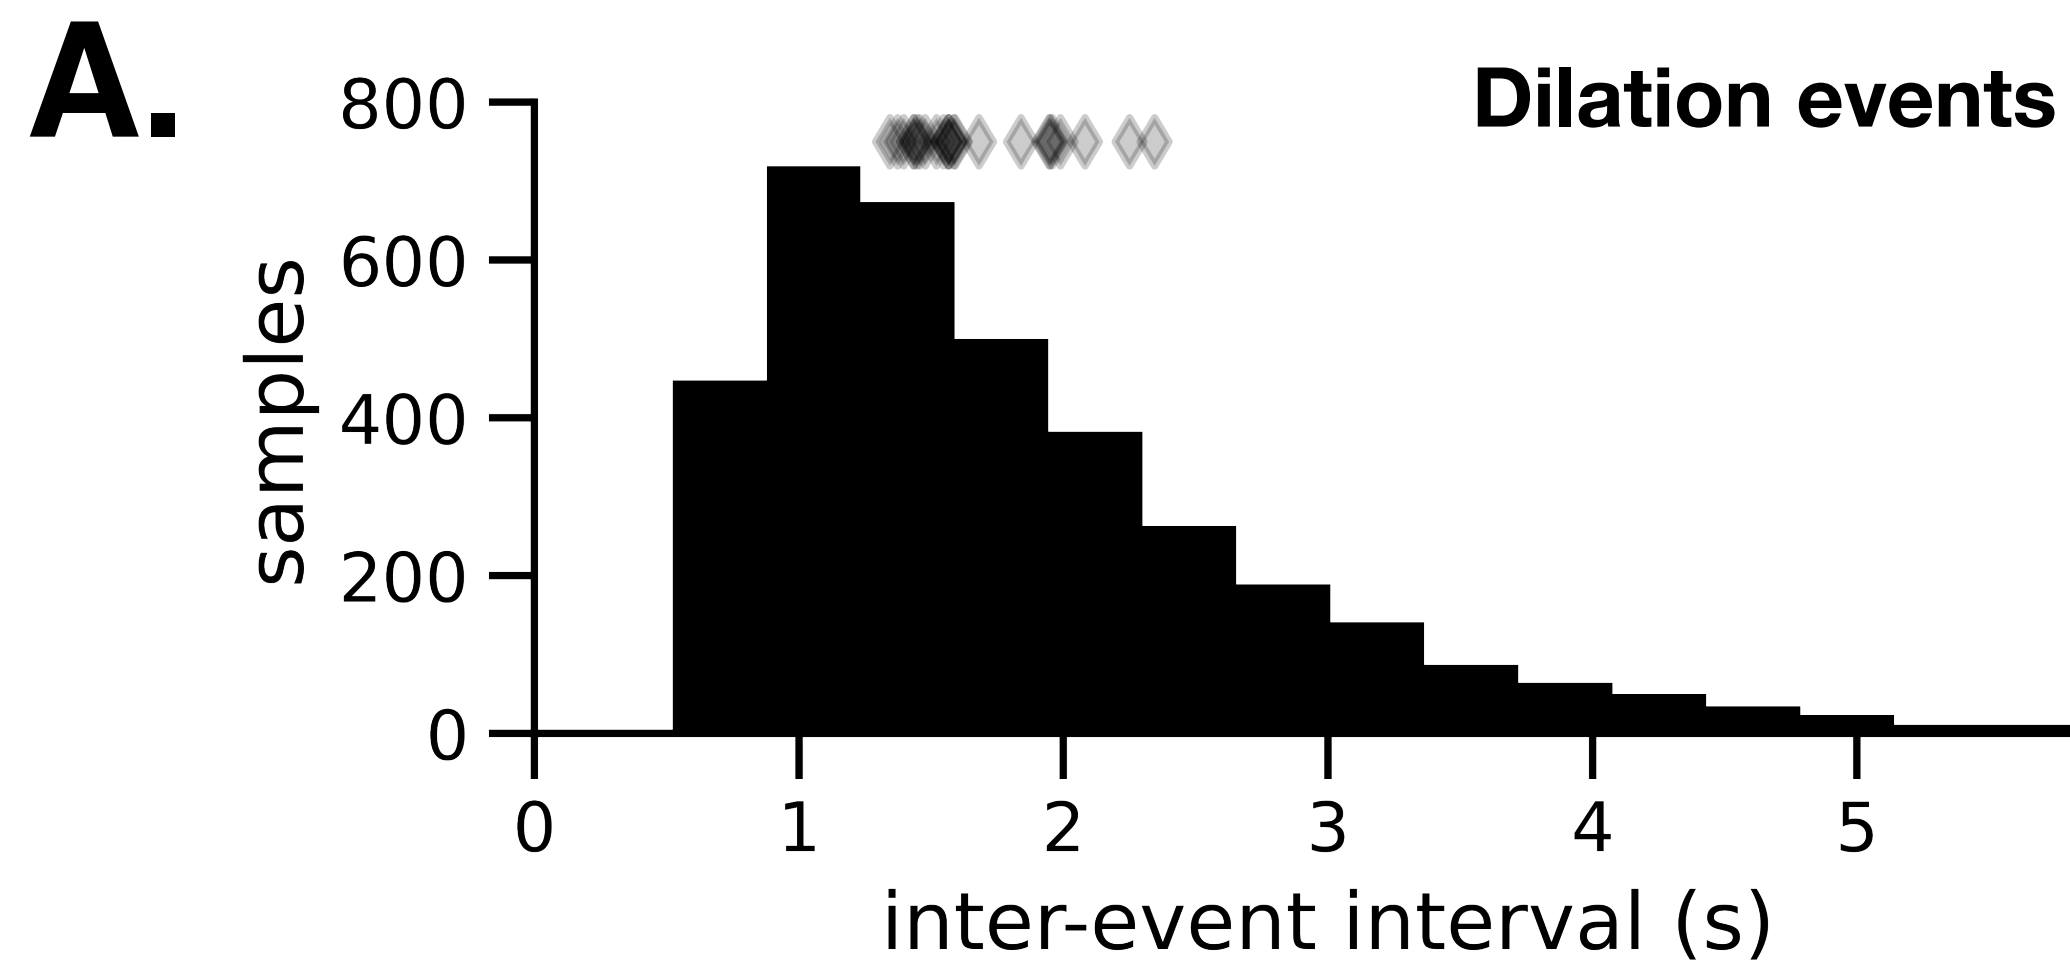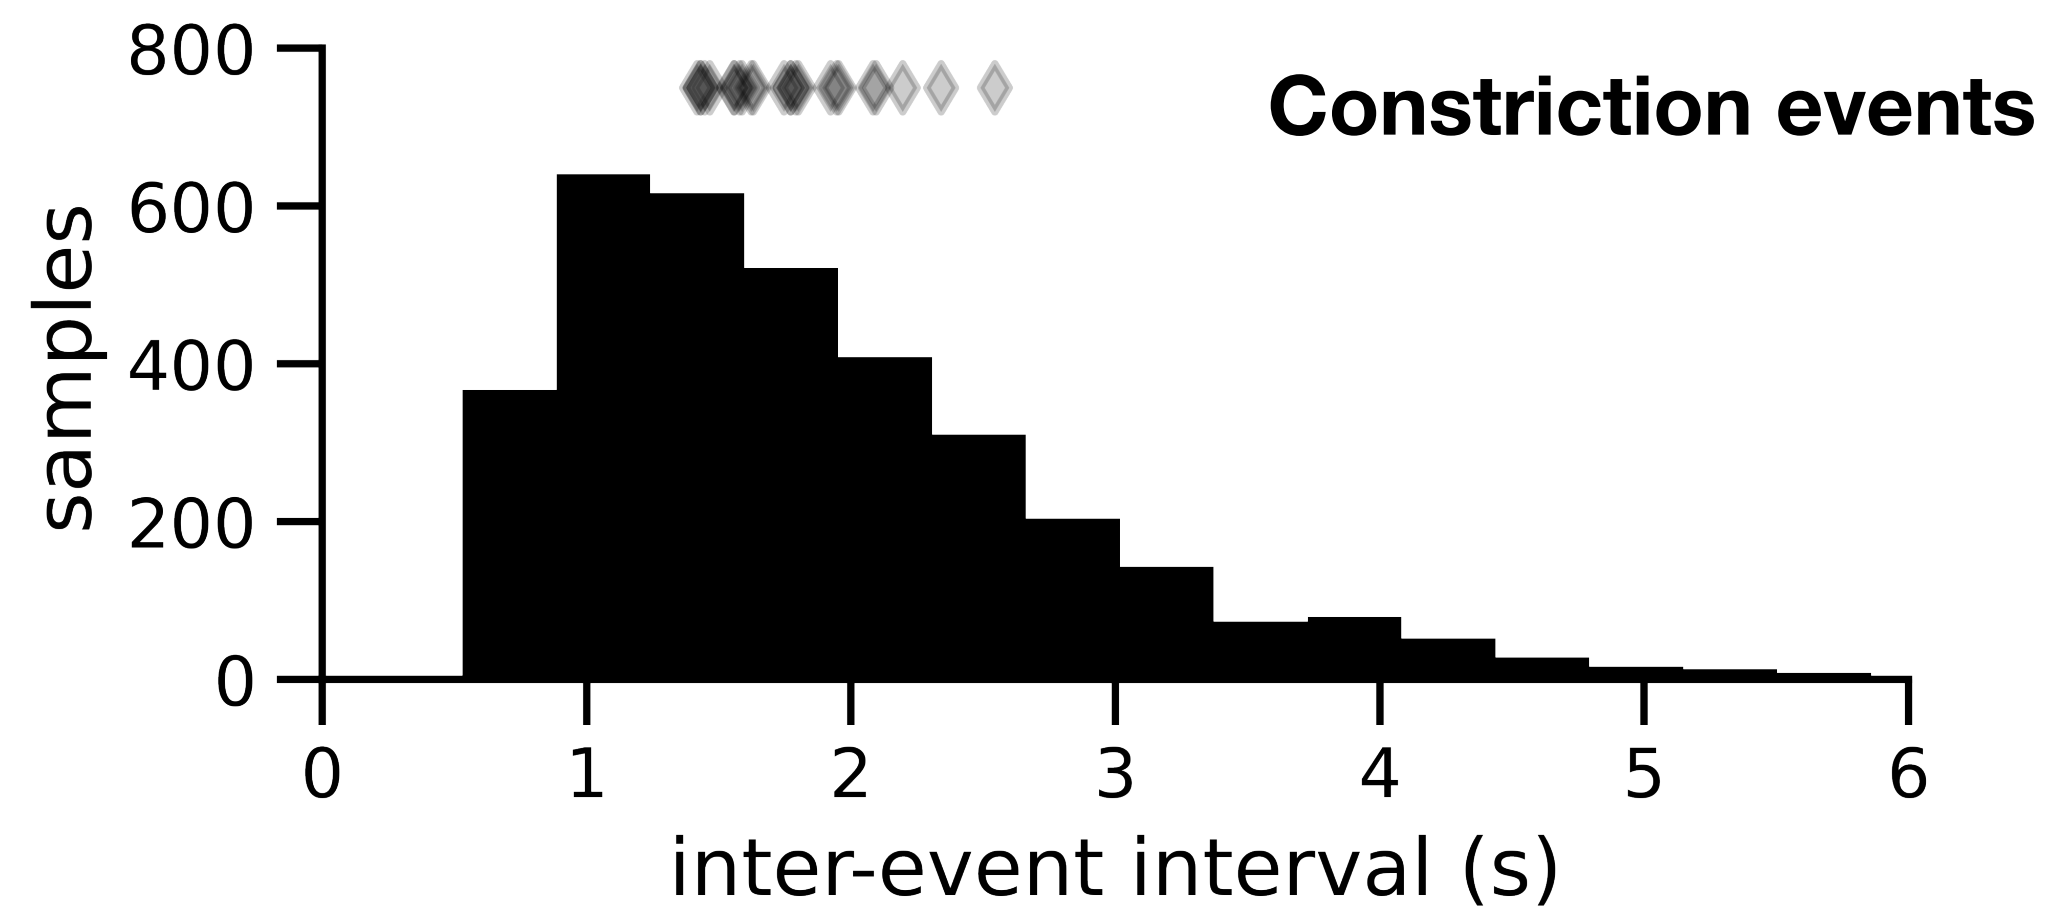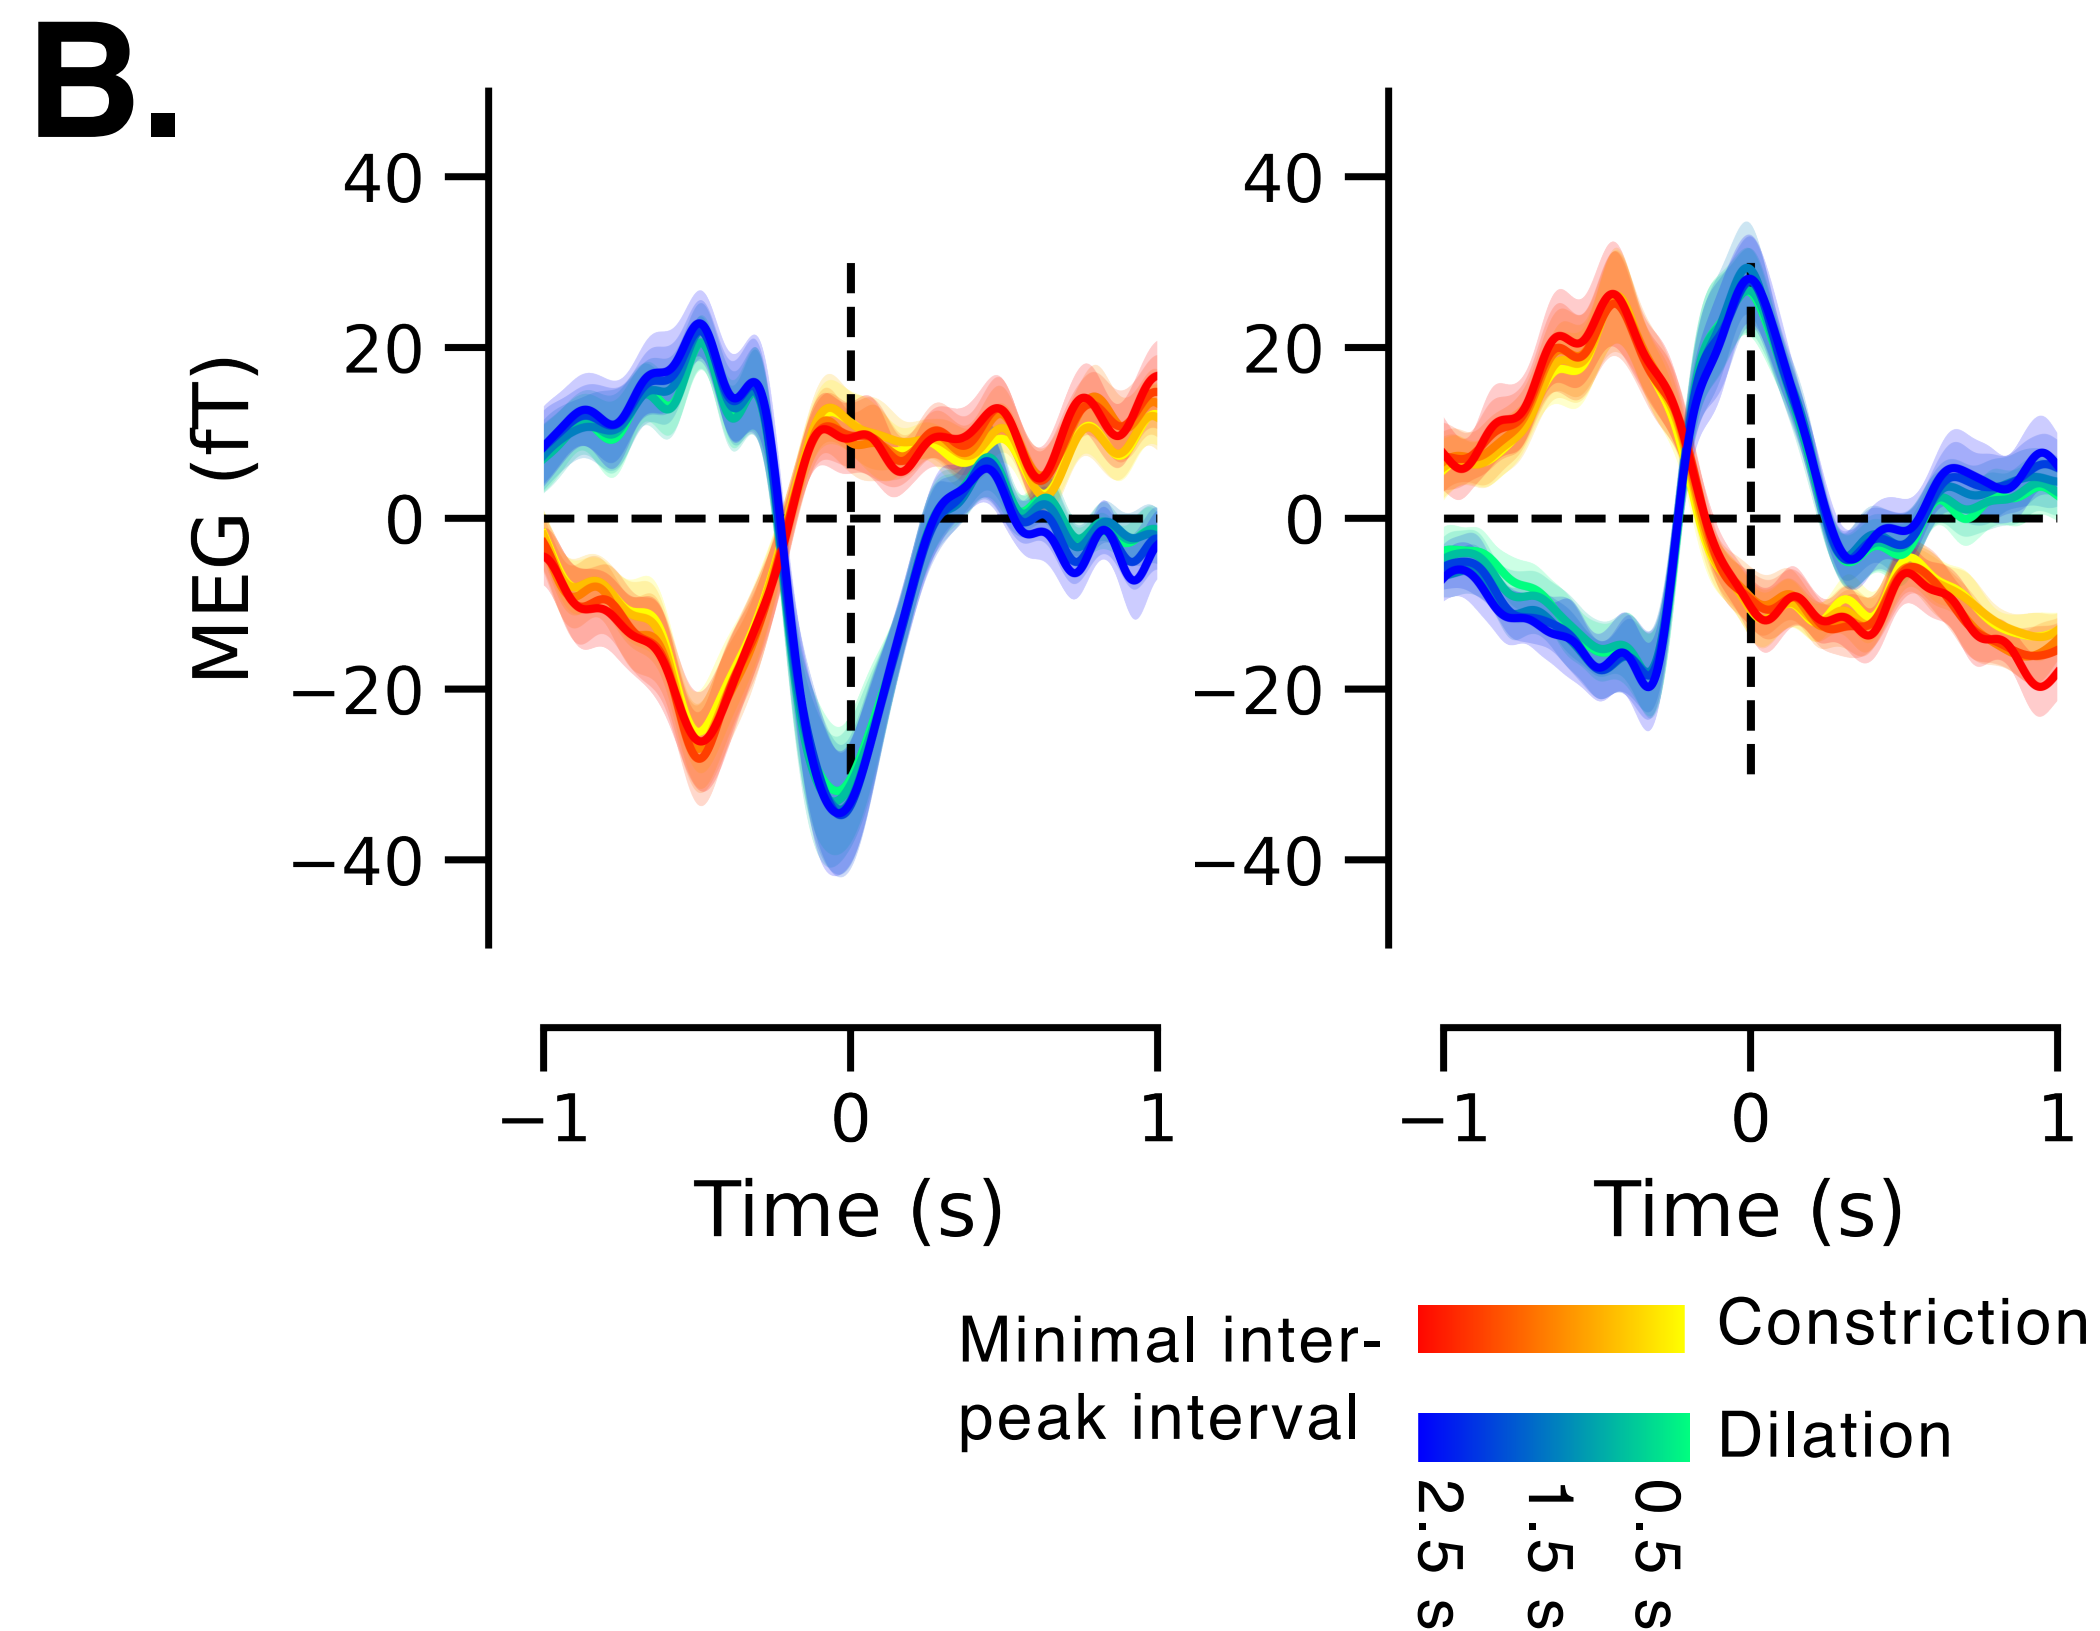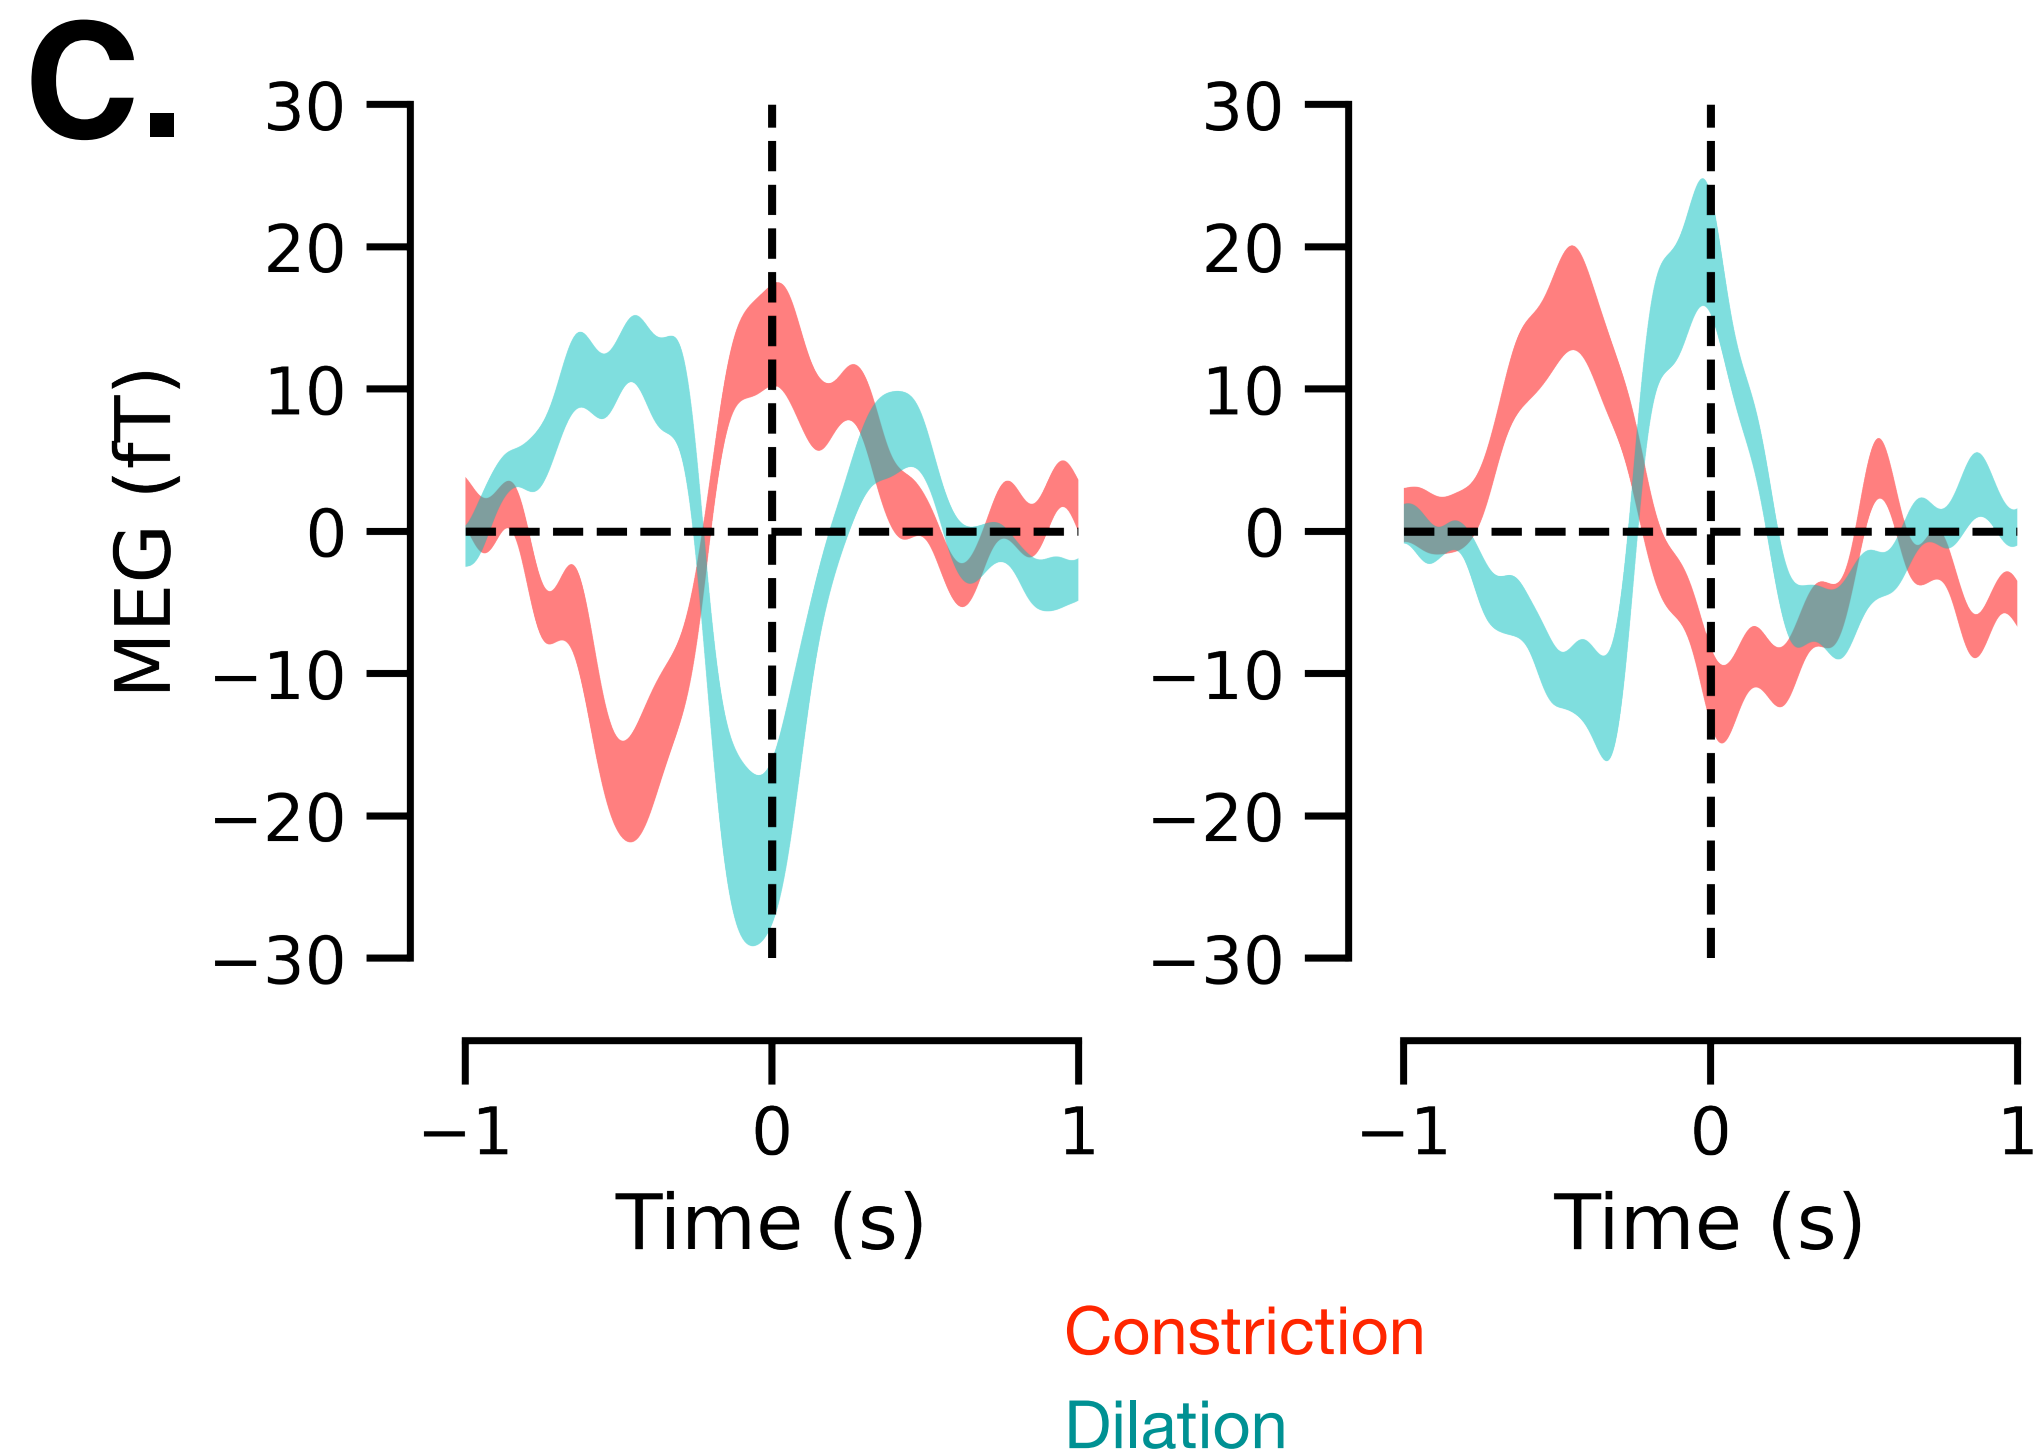

Supplement: supp [file elife-68265-supp-v1.zip]
